# Supplementary material for: Photoelectrocatalytic C–H amination of arenes
Source: Royal Society of Chemistry journal article supplement (doi:10.1039/d3gc02126b), 2023-01-01

| <b>Contents</b>                                                    | <b>Page</b> |
|--------------------------------------------------------------------|-------------|
| <b>1. General Information</b>                                      | <b>S2</b>   |
| <b>2. General Procedure for the Photoelectrolysis</b>              | <b>S2</b>   |
| <b>3. Characterization Data for the Photoelectrolysis Products</b> | <b>S3</b>   |
| <b>4. Cyclic Voltammetry Studies</b>                               | <b>S8</b>   |
| <b>5. NMR Spectra for Photoelectrolysis Products</b>               | <b>S9</b>   |

## 1. General Information

Acetonitrile was obtained by distillation under argon from calcium hydride. Flash column chromatography was performed with silica gel (230–400 mesh). NMR spectra were recorded on Bruker AV-400 and Bruker AV-500 instruments. Data were reported as chemical shifts in ppm relative to TMS (0.00 ppm) for  $^1\text{H}$  and  $\text{CDCl}_3$  (77.2 ppm) for  $^{13}\text{C}$ , respectively. The abbreviations used for explaining the multiplicities were as follows: s = singlet, d = doublet, t = triplet, q = quartet, m = multiplet. High resolution mass spectra (ESI HRMS) were recorded on a Micromass QTOF2 Quadruple/Time-of-Flight Tandem mass spectrometer by the instrumentation center of Department of Chemistry, Xiamen University. Cyclic voltammograms were obtained on a CHI 760E potentiostat. Infrared spectra (IR) were recorded on a Nicolet AVATER FTIR330 spectrometer.

## 2. General Procedure for the Photoelectrolysis

A 10 mL Schlenk tube (Figure S1a) equipped with a RVC (100 PPI, 1.2 cm x 2 cm x 0.5 cm) anode and a Pt plate (1 cm x 1cm) cathode was charged with arene (0.5 mmol), carbamate or azole (1.0 mmol), DDQ (20 mol%),  $\text{Et}_4\text{NBF}_4$  (0.05 mmol) and MeCN (6 mL) under argon. The electrolysis cell was suspended 6 mm above the blue LEDs (25 W). A reflector was employed to increase reaction efficiency (Figure S1b). The photoelectrolysis was carried out at rt (cooled by the axial fan) using a constant current of 2 mA. Upon completion, the reaction mixture was concentrated under reduced pressure. The residue was chromatographed through silica gel eluting with ethyl acetate/hexanes to give the final product.

The gram scale reaction was conducted in a 200 mL beaker-type cell equipped with a RVC anode (100 PPI, 1.2 cm x 5 cm x 5 cm) and a Pt plate (3 cm x 3 cm) cathode. The cell was charged with **1** (1.01 g, 13 mmol, 1.0 equiv), **2** (3.04 g, 26 mmol, 2.0 equiv), DDQ (0.59 g, 20 mol%),  $\text{Et}_4\text{NBF}_4$  (0.28 g, 1.3 mmol, 0.1 equiv), and MeCN (156 mL). 5 blue LEDs (25 W each) were placed around the cell within about 6 mm (Figure S1c). The photoelectrolysis was carried out at rt using a constant current of 52 mA. Upon completion, the reaction mixture was concentrated under reduced pressure. The residue was purified by flash column chromatography on silica gel eluting with ethyl acetate/hexanes to afford **3** as a white solid (1.62 g, 65% yield).

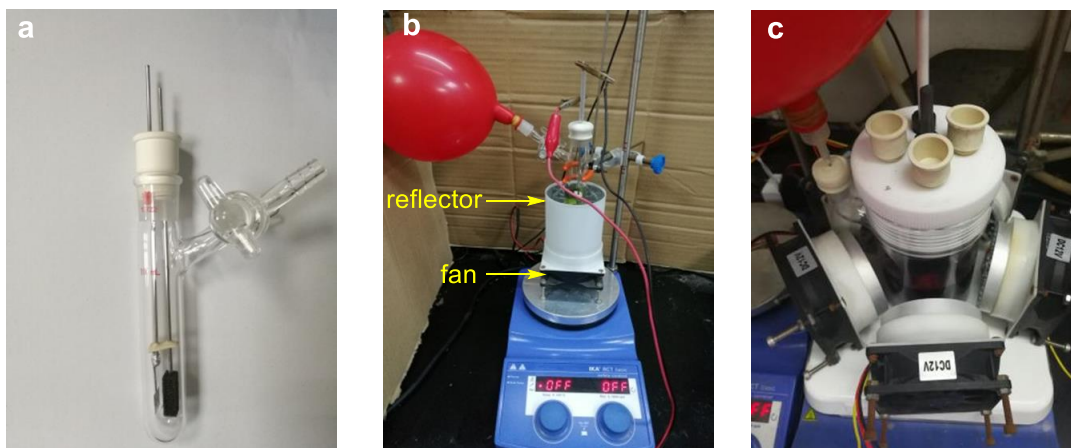

**Figure S1.** a. The assembled electrolysis cell. b. Reaction setup for small scale reaction. c. Reaction setup for the gram scale reaction.

### 3. Characterization Data for the Photoelectrolysis Products

The compounds **3**, **4**, **5**, **6**, **7**, **8**, **9**, **10**, **11**, **12**, **15**, **16**, **17**, **18**, **20**, **21**, **23**, **24**, **25**, **27** and **28** are known in the literature.

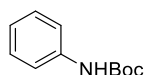

***tert*-Butyl phenylcarbamate (3).** Yield = 83%; White solid;  $^1\text{H}$  NMR (500 MHz,  $\text{CDCl}_3$ )  $\delta$  7.35 (d,  $J$  = 8.0 Hz, 2H), 7.30–7.26 (m, 2H), 7.04–7.00 (m, 1H), 6.52 (s, 1H), 1.52 (s, 9H);  $^{13}\text{C}$  NMR (126 MHz,  $\text{CDCl}_3$ )  $\delta$  152.9, 138.5, 129.1, 123.2, 118.7, 80.6, 28.5.

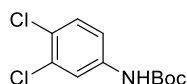

***tert*-Butyl (3,4-dichlorophenyl)carbamate (4).** Yield = 70%; White solid;  $^1\text{H}$  NMR (500 MHz,  $\text{CDCl}_3$ )  $\delta$  7.62 (d,  $J$  = 2.6 Hz, 1H), 7.31 (d,  $J$  = 8.7 Hz, 1H), 7.13 (dd,  $J$  = 8.7, 2.6 Hz, 1H), 6.59 (s, 1H), 1.51 (s, 9H);  $^{13}\text{C}$  NMR (126 MHz,  $\text{CDCl}_3$ )  $\delta$  152.5, 138.1, 132.9, 130.5, 126.2, 120.3, 117.9, 81.5, 28.4.

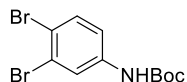

***tert*-Butyl (3,4-dibromophenyl)carbamate (5).** Yield = 58%; White solid;  $^1\text{H}$  NMR (500 MHz,  $\text{CDCl}_3$ )  $\delta$  7.78 (d,  $J$  = 2.6 Hz, 1H), 7.47 (d,  $J$  = 8.7 Hz, 1H), 7.13 (dd,  $J$  = 8.7, 2.6 Hz, 1H), 6.54 (s, 1H), 1.51 (s, 9H);  $^{13}\text{C}$  NMR (126 MHz,  $\text{CDCl}_3$ )  $\delta$  152.4, 138.7, 133.7, 125.1, 123.3, 118.7, 117.8, 81.5, 28.4.

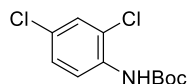

***tert*-Butyl (2,4-dichlorophenyl)carbamate (6).** Yield = 60%; White solid;  $^1\text{H}$  NMR (500 MHz,  $\text{CDCl}_3$ )  $\delta$  8.13 (d,  $J$  = 9.0 Hz, 1H), 7.33 (d,  $J$  = 2.4 Hz, 1H), 7.21 (dd,  $J$  = 9.0, 2.4 Hz, 1H), 6.95 (s, 1H), 1.53 (s, 9H);  $^{13}\text{C}$  NMR (126 MHz,  $\text{CDCl}_3$ )  $\delta$  152.3, 134.2, 128.8, 127.9, 127.8, 122.4, 120.6, 81.6, 28.4.

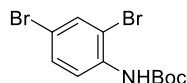

***tert*-Butyl (2,4-dibromophenyl)carbamate (7).** C1:C2 = 1:1. Yield = 46%; White solid;  $^1\text{H}$  NMR (500 MHz,  $\text{CDCl}_3$ )  $\delta$  8.06 (d,  $J$  = 8.9 Hz, 1H), 7.64 (d,  $J$  = 2.2 Hz, 1H), 7.39 (dd,  $J$  = 8.9, 2.2 Hz, 1H), 6.96 (s, 1H), 1.53 (s, 9H);  $^{13}\text{C}$  NMR (126 MHz,  $\text{CDCl}_3$ )  $\delta$  152.3, 135.8, 134.5, 131.4, 121.2, 115.3, 112.8, 81.7, 28.4.

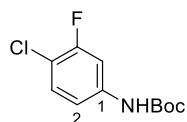

***tert*-Butyl (4-chloro-3-fluorophenyl)carbamate and *tert*-butyl (3-chloro-4-fluorophenyl)carbamate (8).** C1:C2 = 4.5:1. Yield = 38%; White solid;  $^1\text{H}$  NMR (400 MHz,  $\text{CDCl}_3$ )  $\delta$  7.59–7.41 (m, 1H), 7.28–7.10 (m, 1H), 7.07–6.92 (m, 1H), 6.59–6.39 (m, 1H), 1.52 (s, 9H);  $^{13}\text{C}$  NMR (101 MHz,  $\text{CDCl}_3$ )  $\delta$  158.4 (d,  $J$  = 247.0 Hz), 152.4, 138.7 (d,  $J$  = 9.9 Hz), 130.6, 116.7 (d,  $J$  = 22.1 Hz), 114.6, 107.2 (d,  $J$  = 26.0 Hz), 81.5, 28.4;  $^{19}\text{F}$  NMR (376 MHz,  $\text{CDCl}_3$ )  $\delta$  -113.7, -122.8.

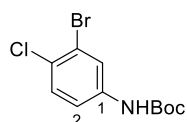

***tert*-Butyl (3-bromo-4-chlorophenyl)carbamate and *tert*-butyl (4-bromo-3-chlorophenyl)carbamate (9).** C1:C2 = 1:1. Yield = 33%; White solid;  $^1\text{H}$  NMR (500 MHz,  $\text{CDCl}_3$ )  $\delta$  7.77 (d,  $J$  = 2.5 Hz, 0.5H), 7.63 (d,  $J$  = 2.5 Hz, 0.5H), 7.47 (d,  $J$  = 8.7 Hz, 0.5H), 7.32 (d,  $J$  = 8.7 Hz, 0.5H), 7.19 (dd,  $J$  = 8.7, 2.6 Hz, 0.5H), 7.07 (dd,  $J$  = 8.8, 2.6 Hz, 0.5H), 6.65 – 6.52 (m, 1H), 1.51 (s, 9H);  $^{13}\text{C}$  NMR (126 MHz,  $\text{CDCl}_3$ )  $\delta$  152.5, 152.4, 138.8, 138.1, 134.9, 133.8, 130.4, 128.2, 123.4, 122.7, 120.1, 118.6, 118.0, 115.4, 81.5, 28.4.

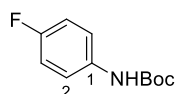

***tert*-Butyl (4-fluorophenyl)carbamate and *tert*-butyl (3-fluorophenyl)carbamate (10).** C1:C2 = 1.2:1. Yield = 49%; White solid;  $^1\text{H}$  NMR (500 MHz,  $\text{CDCl}_3$ )  $\delta$  7.36–7.27 (m, 1.5H), 7.20 (td,  $J$  = 8.3, 6.5 Hz, 0.5H), 7.05–6.94 (m, 1.5H), 6.71 (td,  $J$  = 8.3, 2.5 Hz, 0.5H), 6.67–6.46 (m, 1H), 1.53–1.49 (m, 9H);  $^{19}\text{F}$  NMR (471 MHz,  $\text{CDCl}_3$ )  $\delta$  –111.8 (dt,  $J$  = 10.9, 7.4 Hz), –120.2.

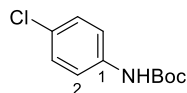

***tert*-Butyl (4-chlorophenyl)carbamate and *tert*-butyl (3-chlorophenyl)carbamate (11).** C1:C2 = 7.5:1. Yield = 71%; White solid;  $^1\text{H}$  NMR (500 MHz,  $\text{CDCl}_3$ )  $\delta$  7.52–6.92 (m, 4H), 6.70–6.51 (m, 1H), 1.54–1.49 (m, 9H);  $^{13}\text{C}$  NMR (126 MHz,  $\text{CDCl}_3$ )  $\delta$  152.8, 137.1, 130.0, 129.1, 129.0, 128.1, 127.8, 123.4, 123.1, 119.9, 81.0 (2C), 28.5, 28.4.

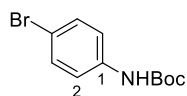

***tert*-Butyl (4-bromophenyl)carbamate and *tert*-butyl (3-bromophenyl)carbamate (12).** C1:C2 = 8:1. Yield = 62%; White solid;  $^1\text{H}$  NMR (500 MHz,  $\text{CDCl}_3$ )  $\delta$  7.67–7.09 (m, 4H), 6.66–6.52 (m, 1H), 1.54–1.48 (m, 9H);  $^{13}\text{C}$  NMR (126 MHz,  $\text{CDCl}_3$ )  $\delta$  152.7, 137.6, 132.0, 130.3, 126.1, 120.2, 115.5, 81.0, 28.5, 28.4.

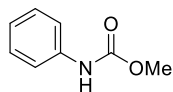

**Methyl phenylcarbamate (15).** Yield = 74%; White solid;  $^1\text{H}$  NMR (500 MHz,  $\text{CDCl}_3$ )  $\delta$  7.38 (d,  $J$  = 8.2 Hz, 2H), 7.29 (dd,  $J$  = 8.2, 7.3 Hz, 2H), 7.05 (t,  $J$  = 7.3 Hz, 1H), 6.84 (s, 1H), 3.76 (s, 3H);  $^{13}\text{C}$  NMR (126 MHz,  $\text{CDCl}_3$ )  $\delta$  154.3, 138.0, 129.1, 123.6, 118.9, 52.5.

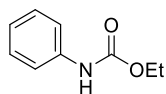

**Ethyl phenylcarbamate (16).** Yield = 78%; White solid;  $^1\text{H}$  NMR (500 MHz,  $\text{CDCl}_3$ )  $\delta$  7.38 (d,  $J$  = 8.2 Hz, 2H), 7.28 (dd,  $J$  = 8.2, 7.3 Hz, 2H), 7.04 (t,  $J$  = 7.2 Hz, 1H), 6.78 (s, 1H), 4.22 (q,  $J$  = 7.1 Hz, 2H), 1.29 (t,  $J$  = 7.1 Hz, 3H);  $^{13}\text{C}$  NMR (126 MHz,  $\text{CDCl}_3$ )  $\delta$  153.9, 138.1, 129.1, 123.4, 118.8, 61.3, 14.7.

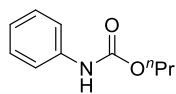

**Propyl phenylcarbamate (17).** Yield = 71%; White solid;  $^1\text{H}$  NMR (500 MHz,  $\text{CDCl}_3$ )  $\delta$  7.39 (d,  $J$  = 8.0 Hz, 2H), 7.31–7.26 (m, 2H), 7.04 (t,  $J$  = 7.4 Hz, 1H), 6.77 (s, 1H), 4.12 (t,  $J$  = 6.7 Hz, 2H), 1.73–1.65 (m, 2H), 0.97 (t,  $J$  = 7.5 Hz, 3H);  $^{13}\text{C}$  NMR (126 MHz,  $\text{CDCl}_3$ )  $\delta$  153.9, 138.1, 129.1, 123.4, 118.8, 67.0, 22.4, 10.5.

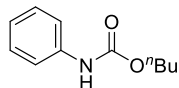

**Butyl phenylcarbamate (18).** Yield = 71%; White solid;  $^1\text{H}$  NMR (500 MHz,  $\text{CDCl}_3$ )  $\delta$  7.38 (d,  $J$  = 8.0 Hz, 2H), 7.31–7.25 (m, 2H), 7.04 (t,  $J$  = 7.4 Hz, 1H), 6.80 (s, 1H), 4.16 (t,  $J$  = 6.7 Hz, 2H), 1.68–1.61 (m, 2H), 1.44–1.36 (m, 2H), 0.94 (t,  $J$  = 7.4 Hz, 3H);  $^{13}\text{C}$  NMR (126 MHz,  $\text{CDCl}_3$ )  $\delta$  154.0, 138.2, 129.1, 123.4, 118.8, 65.2, 31.1, 19.2, 13.8.

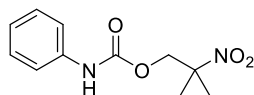

**2-Methyl-2-nitropropyl phenylcarbamate (19).** Yield = 57%; White solid;  $^1\text{H}$  NMR (500 MHz,  $\text{CDCl}_3$ )  $\delta$  7.42–7.32 (m, 2H), 7.32–7.28 (m, 2H), 7.10–7.05 (m, 1H), 6.84 (s, 1H), 4.50 (s, 2H), 1.64 (s, 6H);  $^{13}\text{C}$  NMR (126 MHz,  $\text{CDCl}_3$ )  $\delta$  152.6, 137.4, 129.2, 124.1, 119.0, 86.7, 69.0, 23.1; IR (neat,  $\text{cm}^{-1}$ ): 3397, 1636, 1543, 1444, 1219, 1070, 692; ESI HRMS  $m/z$  ( $\text{M}+\text{Na}$ ) $^+$  calcd 261.0846, obsd 261.0849.

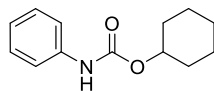

**Cyclohexyl phenylcarbamate (20).** Yield = 81%; White solid;  $^1\text{H}$  NMR (500 MHz,  $\text{CDCl}_3$ )  $\delta$  7.38 (d,  $J$  = 8.0 Hz, 2H), 7.30–7.26 (m, 2H), 7.03 (t,  $J$  = 7.4 Hz, 1H), 6.73 (s, 1H), 4.79–4.71 (m, 1H), 1.96–1.90 (m, 2H), 1.76–1.70 (m, 2H), 1.57–1.51 (m, 1H), 1.48–1.34 (m, 4H), 1.29–1.21 (m, 1H);  $^{13}\text{C}$  NMR (126 MHz,  $\text{CDCl}_3$ )  $\delta$  153.4, 138.3, 129.1, 123.3, 118.7, 73.7, 32.0, 25.5, 23.9.

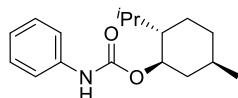

**(1R,2S,5R)-2-Isopropyl-5-methylcyclohexyl phenylcarbamate (21).** Yield = 67%; White solid;  $^1\text{H}$  NMR (500 MHz,  $\text{CDCl}_3$ )  $\delta$  7.40 (d,  $J$  = 8.0 Hz, 2H), 7.31–7.26 (m, 2H), 7.06–7.01 (m, 1H), 6.69 (s, 1H), 4.66 (td,  $J$  = 10.9, 4.3 Hz, 1H), 2.13–2.07 (m, 1H), 2.01–1.93 (m, 1H), 1.71–1.64 (m, 2H), 1.53–1.44 (m, 1H), 1.39–1.32 (m, 1H), 1.11–0.96 (m, 2H), 0.94–0.82 (m, 7H), 0.81 (d,  $J$  = 7.0 Hz, 3H);  $^{13}\text{C}$  NMR (126 MHz,  $\text{CDCl}_3$ )  $\delta$  153.5, 138.3, 129.1, 123.3, 118.6, 75.2, 47.4, 41.5, 34.4, 31.5, 26.4, 23.6, 22.2, 21.0, 16.6.



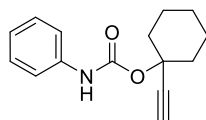

**1-Ethynylcyclohexyl phenylcarbamate (22).** Yield = 59%; White solid;  $^1\text{H}$  NMR (500 MHz,  $\text{CDCl}_3$ )  $\delta$  7.40 (d,  $J$  = 8.0 Hz, 2H), 7.30–7.26 (m, 2H), 7.03 (t,  $J$  = 7.4 Hz, 1H), 6.67 (s, 1H), 2.64 (s, 1H), 2.24–2.17 (m, 2H), 1.97–1.88 (m, 2H), 1.69–1.61 (m, 4H), 1.57–1.50 (m, 1H), 1.38–1.30 (m, 1H);  $^{13}\text{C}$  NMR (126 MHz,  $\text{CDCl}_3$ )  $\delta$  151.7, 138.0, 129.1, 123.4, 118.7, 83.9, 75.8, 74.6, 37.4, 25.2, 22.7; IR (neat,  $\text{cm}^{-1}$ ): 3305, 2936, 1712, 1523, 1442, 1313, 1220, 1052, 751; ESI HRMS  $m/z$  ( $\text{M}+\text{Na}$ ) $^+$  calcd 266.1151, obsd 266.1158.

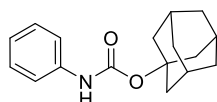

**(3R,5R)-Adamantan-1-yl phenylcarbamate (23).** Yield = 87%; White solid;  $^1\text{H}$  NMR (500 MHz,  $\text{CDCl}_3$ )  $\delta$  7.35 (d,  $J$  = 8.1 Hz, 2H), 7.29–7.25 (m, 2H), 7.01 (t,  $J$  = 7.4 Hz, 1H), 6.56 (s, 1H), 2.20–2.15 (m, 9H), 1.71–1.63 (m, 6H);  $^{13}\text{C}$  NMR (126 MHz,  $\text{CDCl}_3$ )  $\delta$  152.5, 138.5, 129.0, 123.1, 118.6, 80.5, 41.7, 36.3, 31.0.

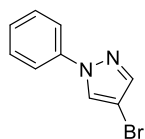

**4-Bromo-1-phenyl-1H-pyrazole (24).** Yield = 65%; White solid;  $^1\text{H}$  NMR (500 MHz,  $\text{CDCl}_3$ )  $\delta$  7.91 (s, 1H), 7.66 (s, 1H), 7.64–7.60 (m, 2H), 7.46–7.41 (m, 2H), 7.32–7.28 (m, 1H);  $^{13}\text{C}$  NMR (126 MHz,  $\text{CDCl}_3$ )  $\delta$  141.6, 139.8, 129.7, 127.2, 127.1, 119.1, 95.8.

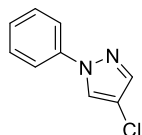

**4-Chloro-1-phenyl-1H-pyrazole (25).** Yield = 69%; White solid;  $^1\text{H}$  NMR (500 MHz,  $\text{CDCl}_3$ )  $\delta$  7.88 (s, 1H), 7.64–7.60 (m, 3H), 7.46–7.41 (m, 2H), 7.29 (t,  $J$  = 7.5 Hz, 1H);  $^{13}\text{C}$  NMR (126 MHz,  $\text{CDCl}_3$ )  $\delta$  139.9, 139.6, 129.7, 127.1, 124.9, 119.1, 112.5.

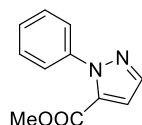

**Methyl 1-phenyl-1H-pyrazole-5-carboxylate (26).** Yield = 62%; White solid;  $^1\text{H}$  NMR (500 MHz,  $\text{CDCl}_3$ )  $\delta$  7.68 (d,  $J$  = 2.0 Hz, 1H), 7.49–7.40 (m, 5H), 7.01 (d,  $J$  = 2.0 Hz, 1H), 3.78 (s, 3H);  $^{13}\text{C}$  NMR (126 MHz,  $\text{CDCl}_3$ )  $\delta$  159.7, 140.3, 139.8, 133.1, 128.8, 128.7, 126.0, 112.7,

52.1; IR (neat,  $\text{cm}^{-1}$ ): 2920, 1733, 1501, 1316, 1238, 1103, 760; ESI HRMS  $m/z$  ( $\text{M}+\text{Na}$ )<sup>+</sup> calcd 225.0634, obsd 225.0626.

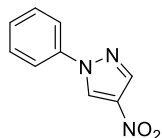

**4-Nitro-1-phenyl-1H-pyrazole (27).** Yield = 53%; White solid;  $^1\text{H}$  NMR (400 MHz,  $\text{CDCl}_3$ )  $\delta$  8.63 (s, 1H), 8.27 (s, 1H), 7.75–7.67 (m, 2H), 7.57–7.50 (m, 2H), 7.47–7.41 (m, 1H);  $^{13}\text{C}$  NMR (151 MHz,  $\text{CDCl}_3$ )  $\delta$  138.8, 137.5, 136.9, 130.1, 128.9, 126.0, 120.0.

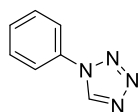

**Phenyl-1H-tetrazole (28).** Yield = 36%; White solid;  $^1\text{H}$  NMR (400 MHz,  $\text{CDCl}_3$ )  $\delta$  9.03 (s, 1H), 7.77–7.69 (m, 2H), 7.64–7.52 (m, 3H);  $^{13}\text{C}$  NMR (101 MHz,  $\text{CDCl}_3$ )  $\delta$  140.7, 134.0, 130.4, 130.2, 121.4.

#### 4. Cyclic Voltammetry Studies

The cyclic voltammogram of DDQ (3 mM) was recorded in an electrolyte of  $\text{Et}_4\text{NPF}_6$  (0.1 M) in MeCN (5 mL) using a glassy carbon disk working electrode (diameter, 1 mm), a Pt wire auxiliary electrode and a SCE reference electrode. The scan rate is 100 mV/s.

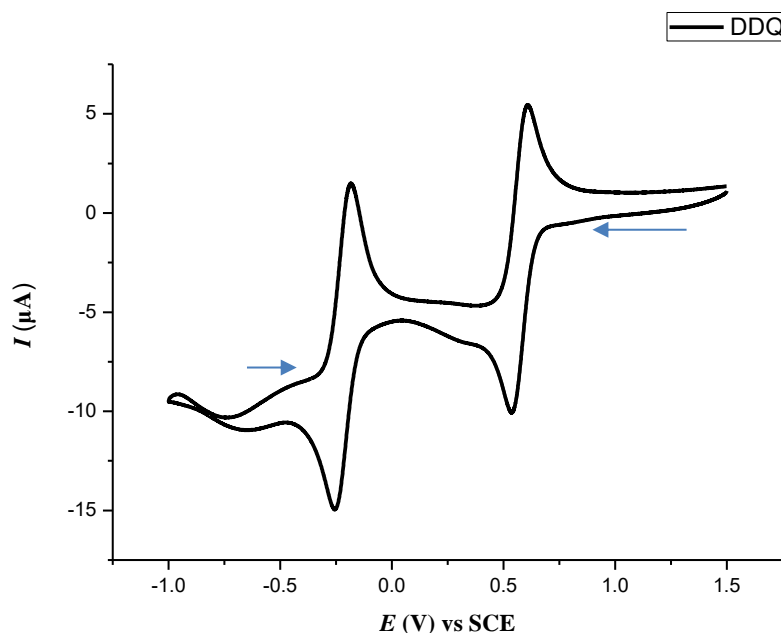

**Figure S2.** Cyclic voltammogram of DDQ (3 mM).

## 5. NMR Spectra for Photoelectrolysis Products

### Compound 3

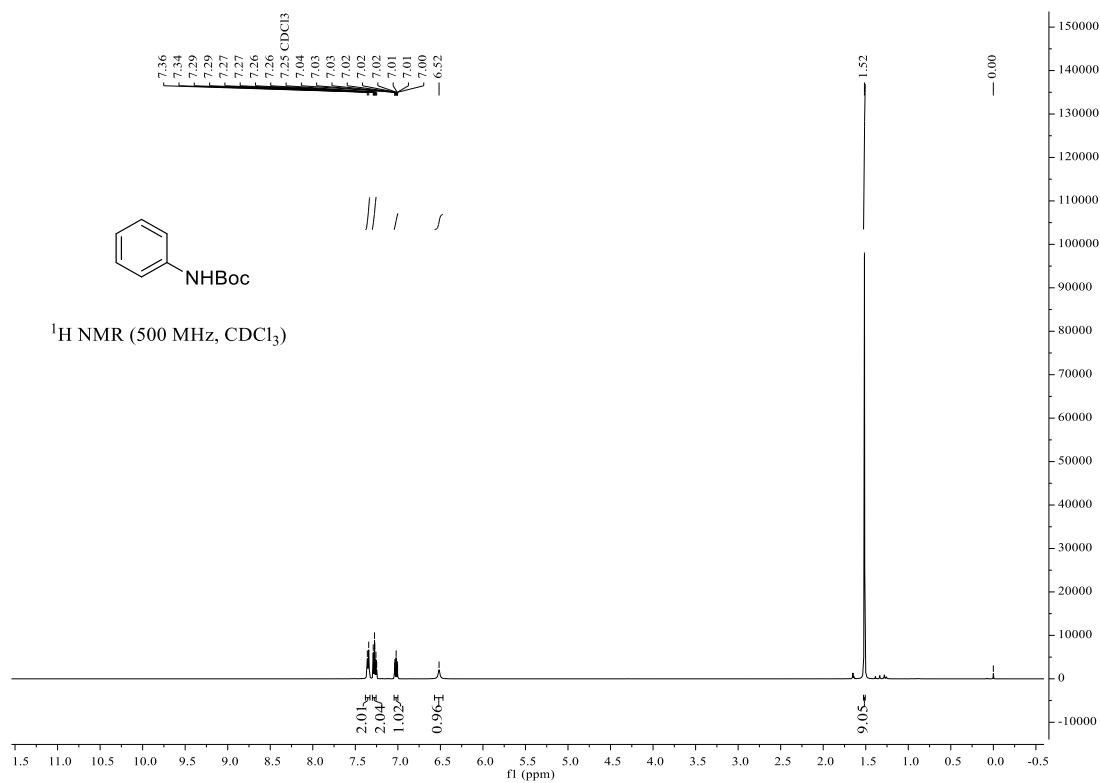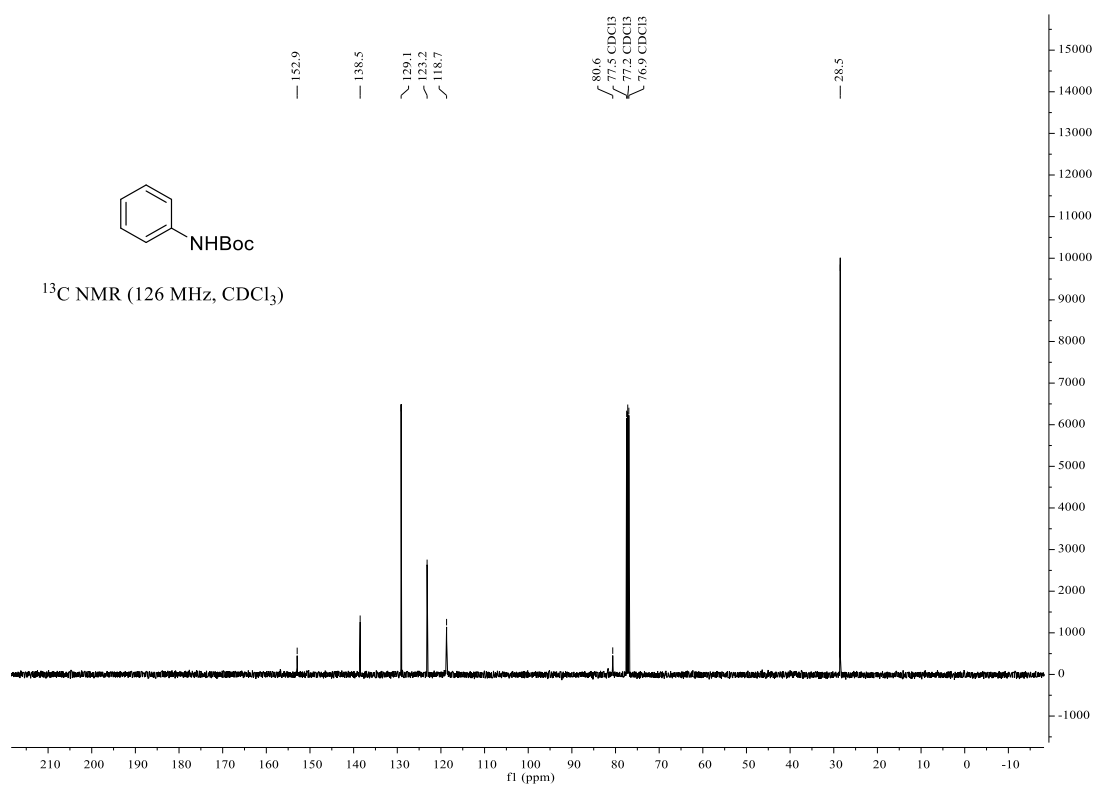

## Compound 4

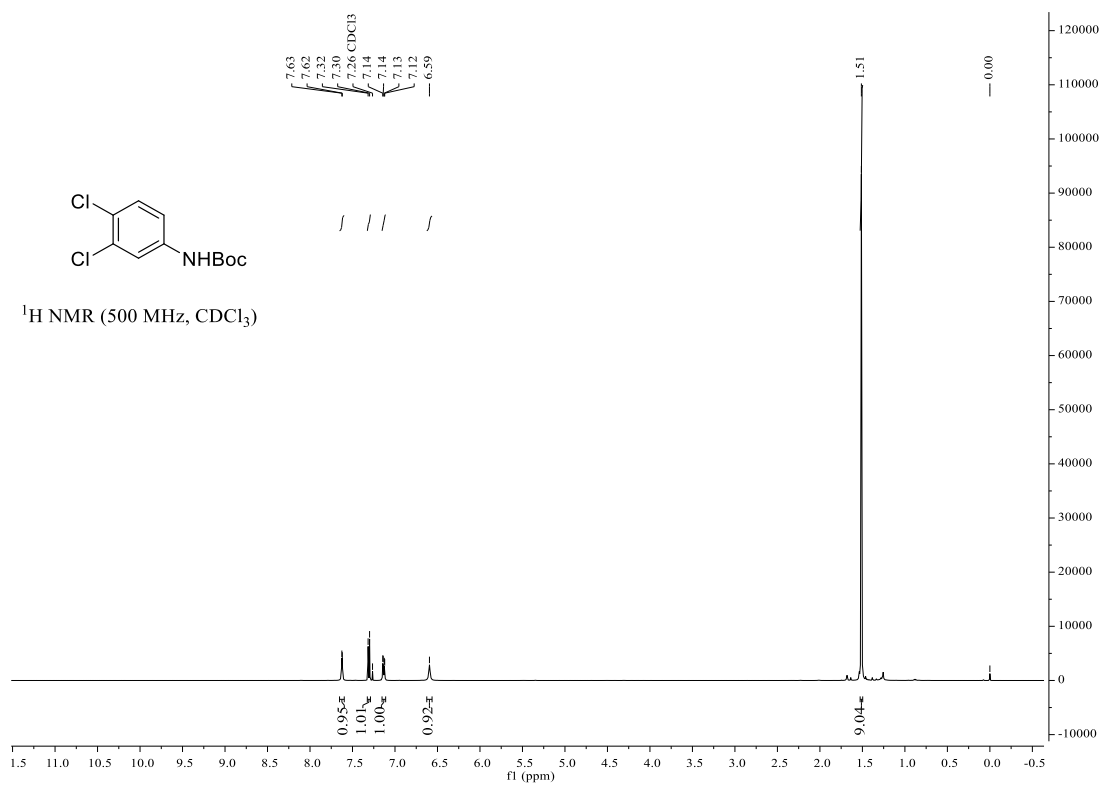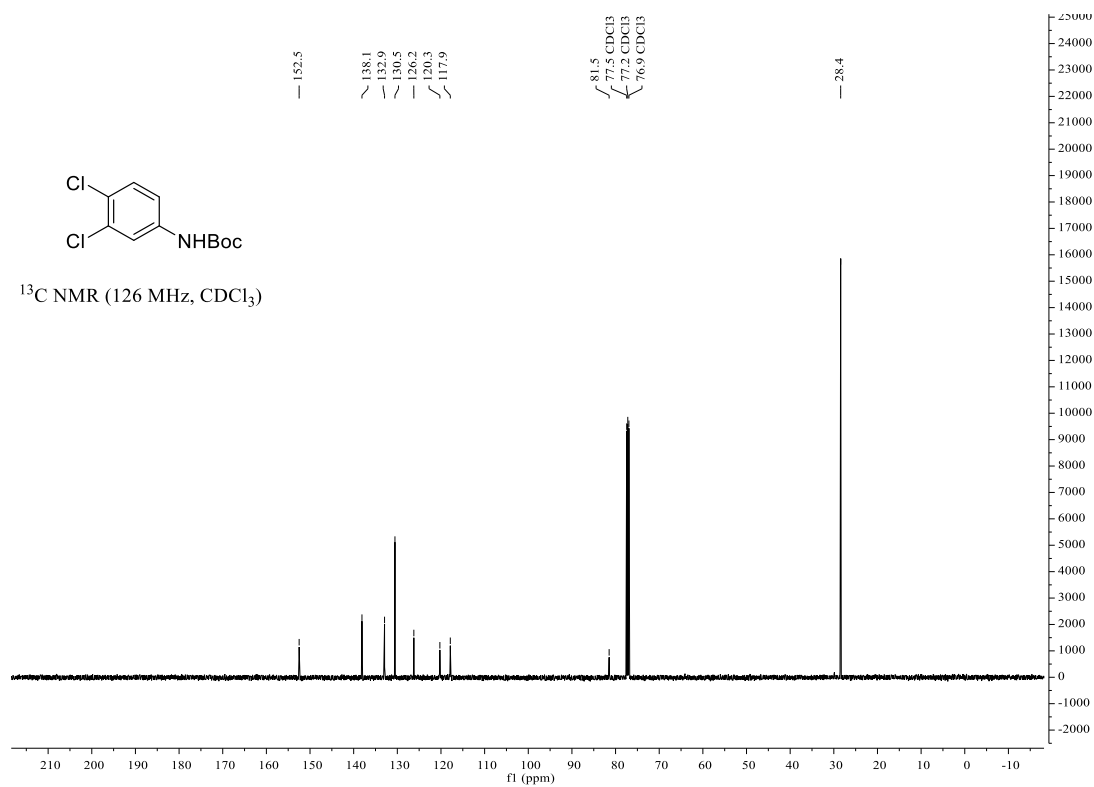

# Compound 5

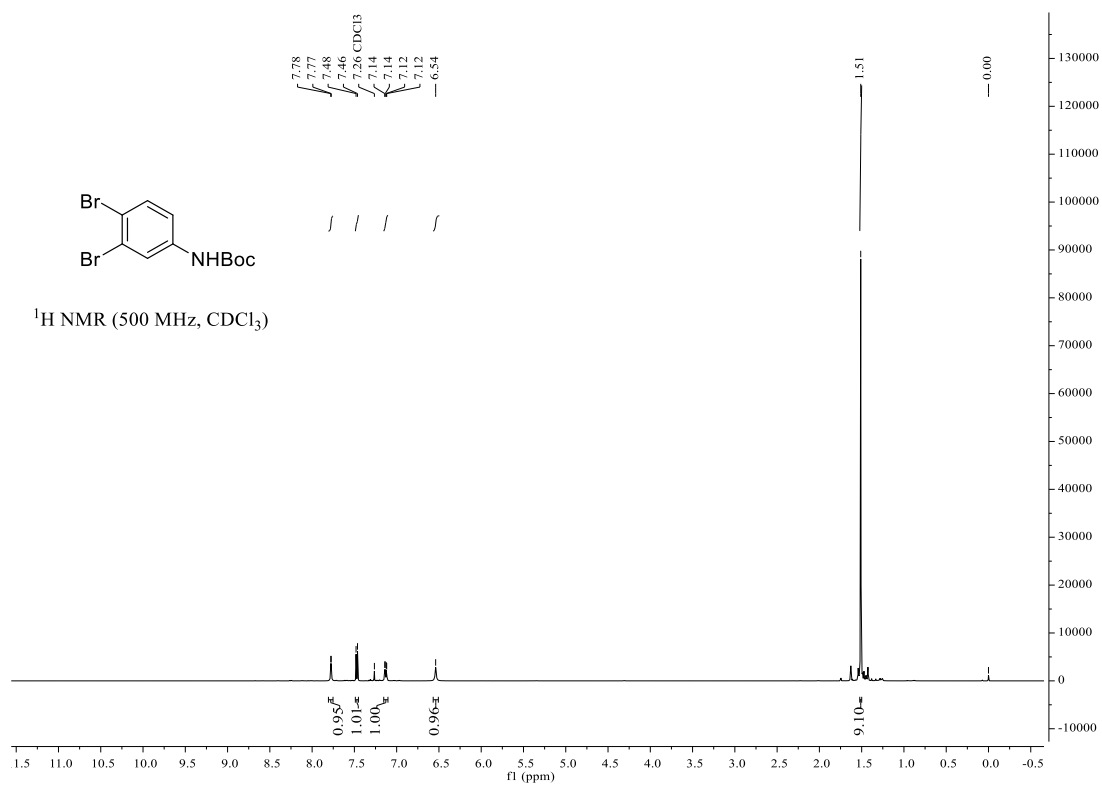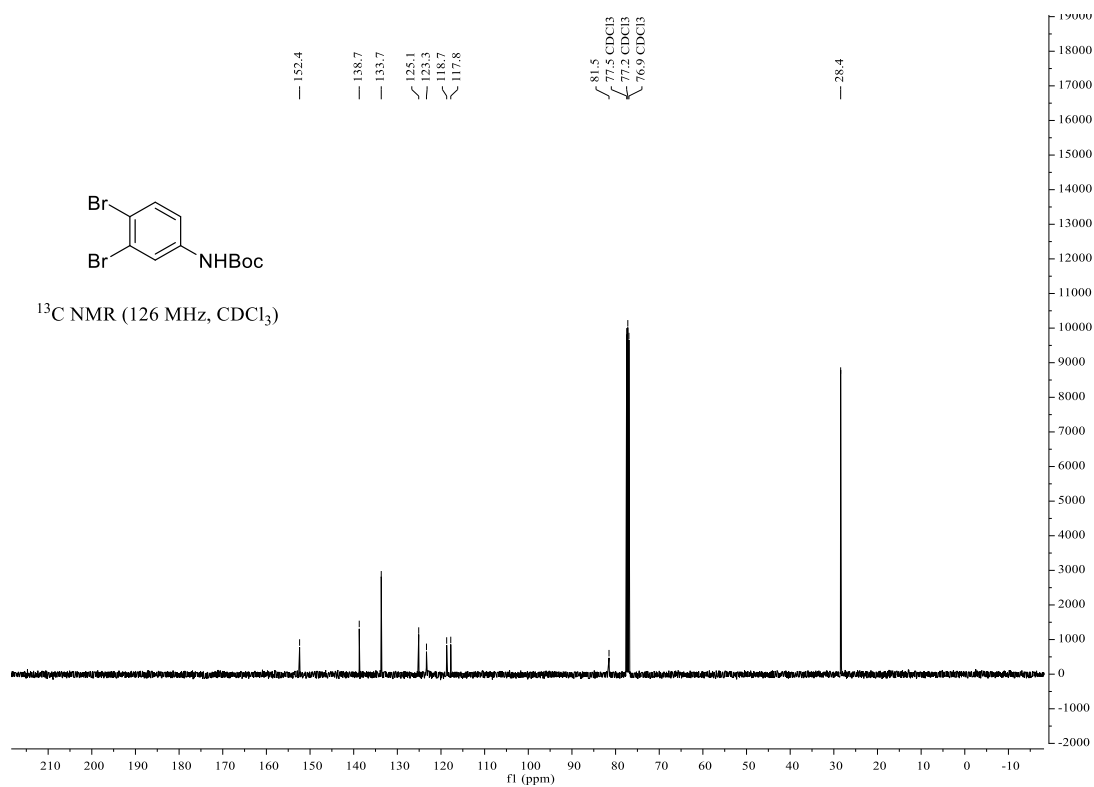

# Compound 6

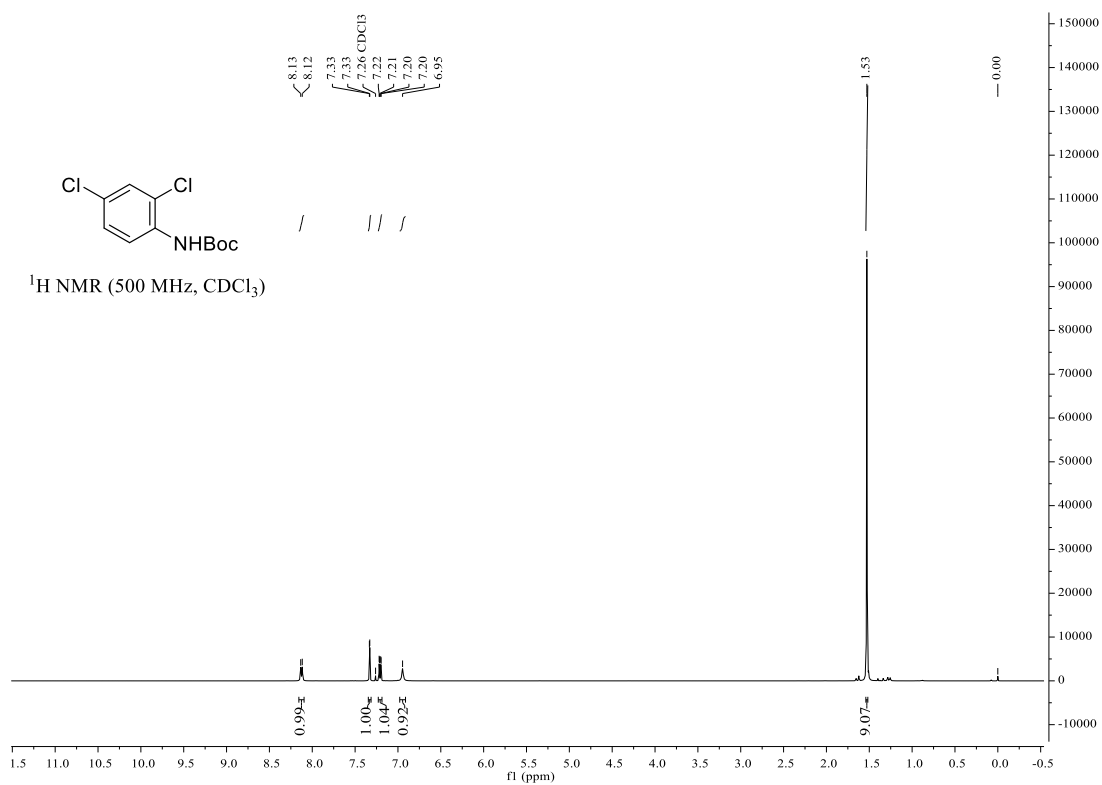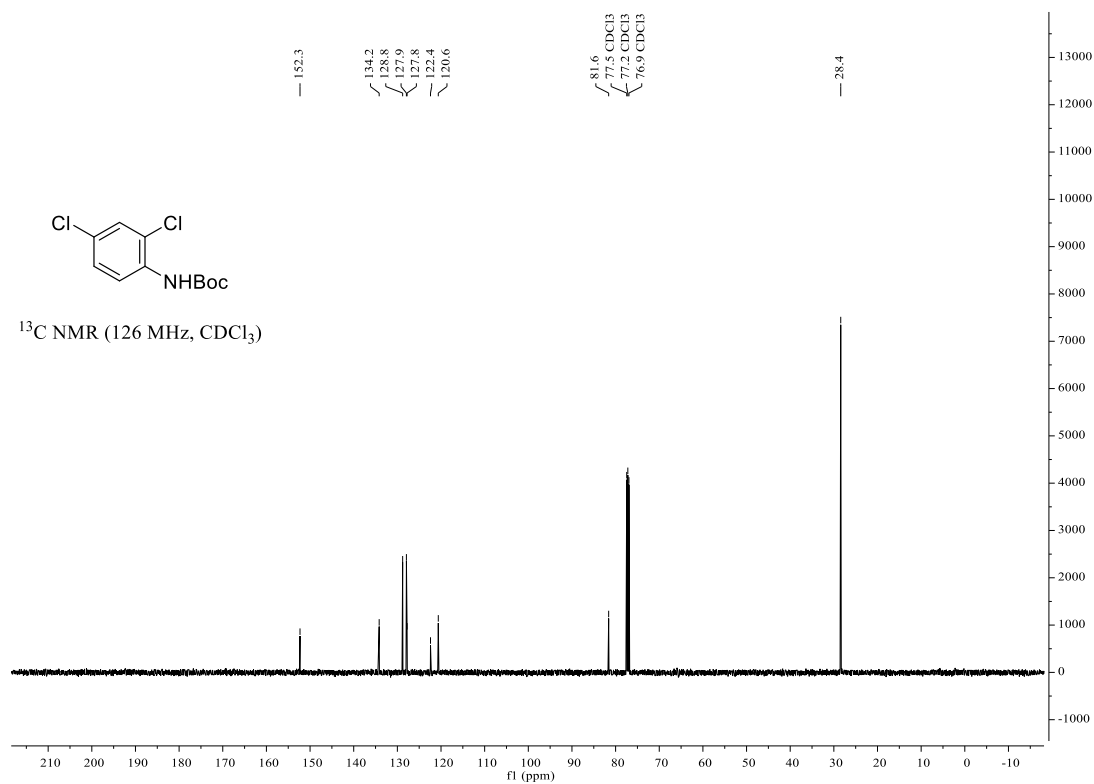

# Compound 7

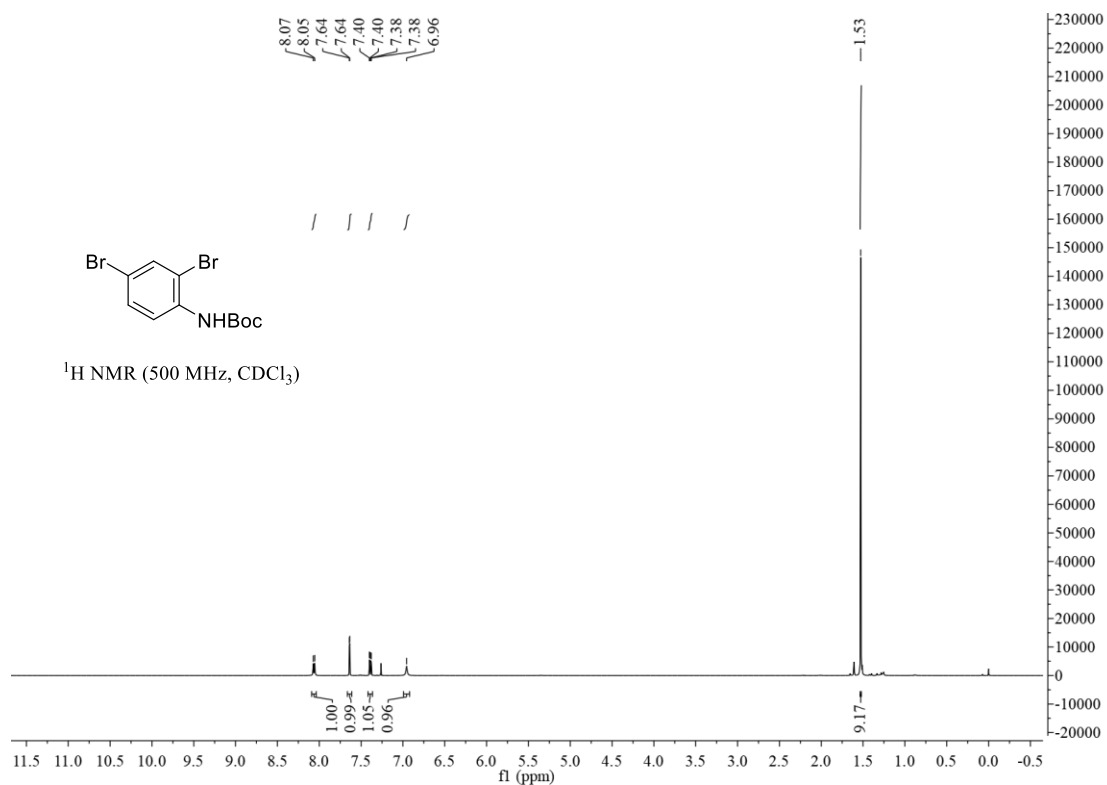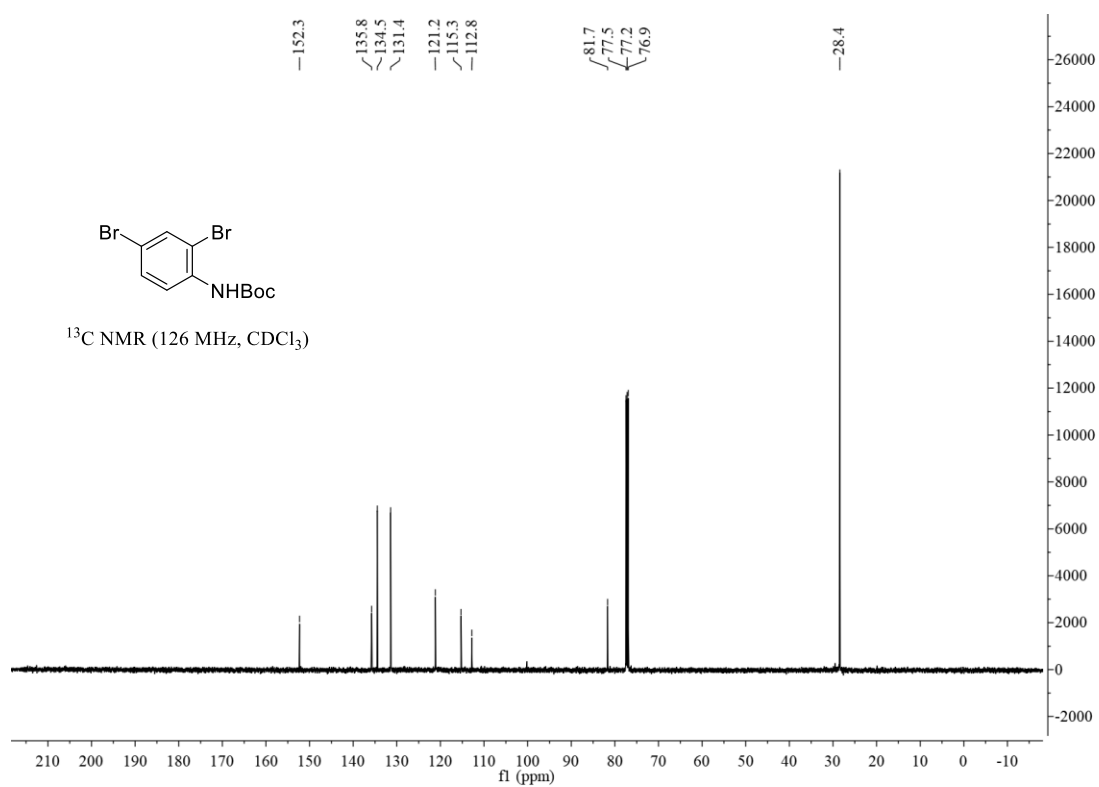

Clc1cc(F)ccc1NC(=O)OC(C)(C)C

C1:C2 = 4.5:1  
<sup>1</sup>H NMR (400 MHz, CDCl<sub>3</sub>)

The <sup>1</sup>H NMR spectrum (400 MHz, CDCl<sub>3</sub>) displays the following peaks and integrations:

| Chemical Shift (ppm)                                                                                                                                       | Integration            |
|------------------------------------------------------------------------------------------------------------------------------------------------------------|------------------------|
| 7.58, 7.56, 7.45, 7.44, 7.42, 7.42, 7.28, 7.26, 7.26, 7.24, 7.14, 7.13, 7.12, 7.11, 7.10, 7.06, 7.04, 7.02, 6.96, 6.95, 6.95, 6.94, 6.93, 6.93, 6.52, 6.44 | 1.00, 1.31, 1.05, 1.01 |
| 1.58 (H <sub>2</sub> O), 1.52                                                                                                                              | 9.00                   |
| 0.00                                                                                                                                                       | -                      |

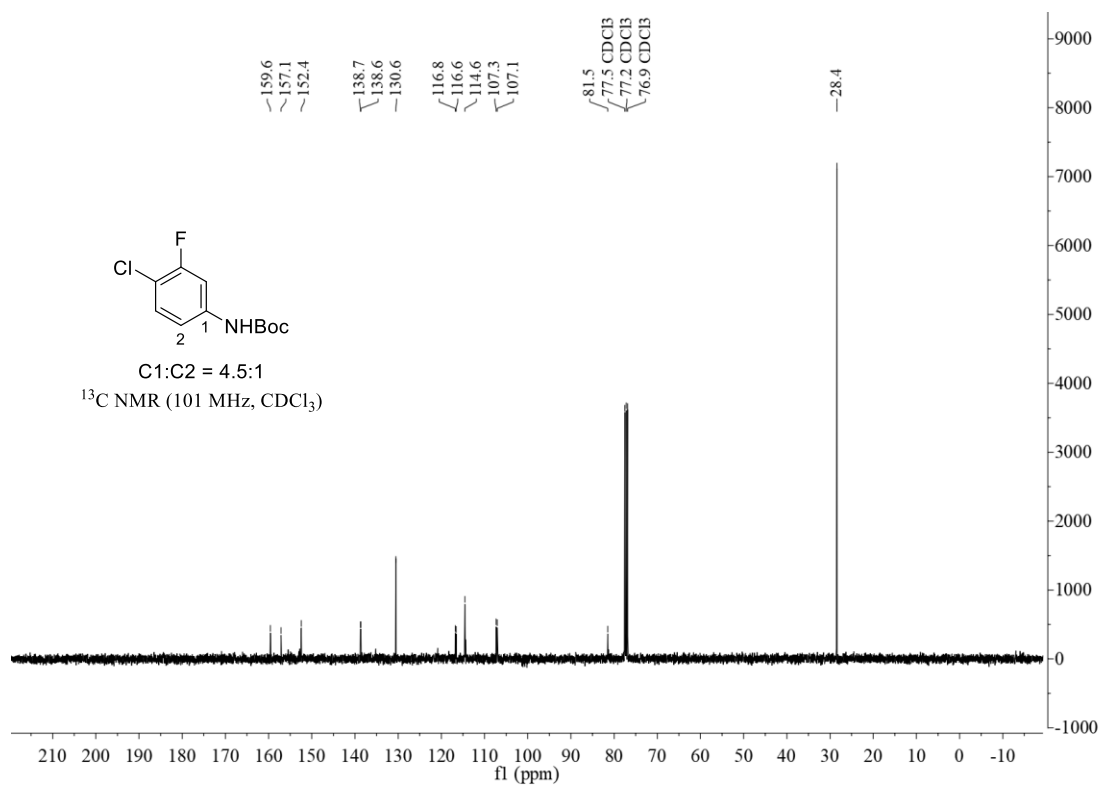

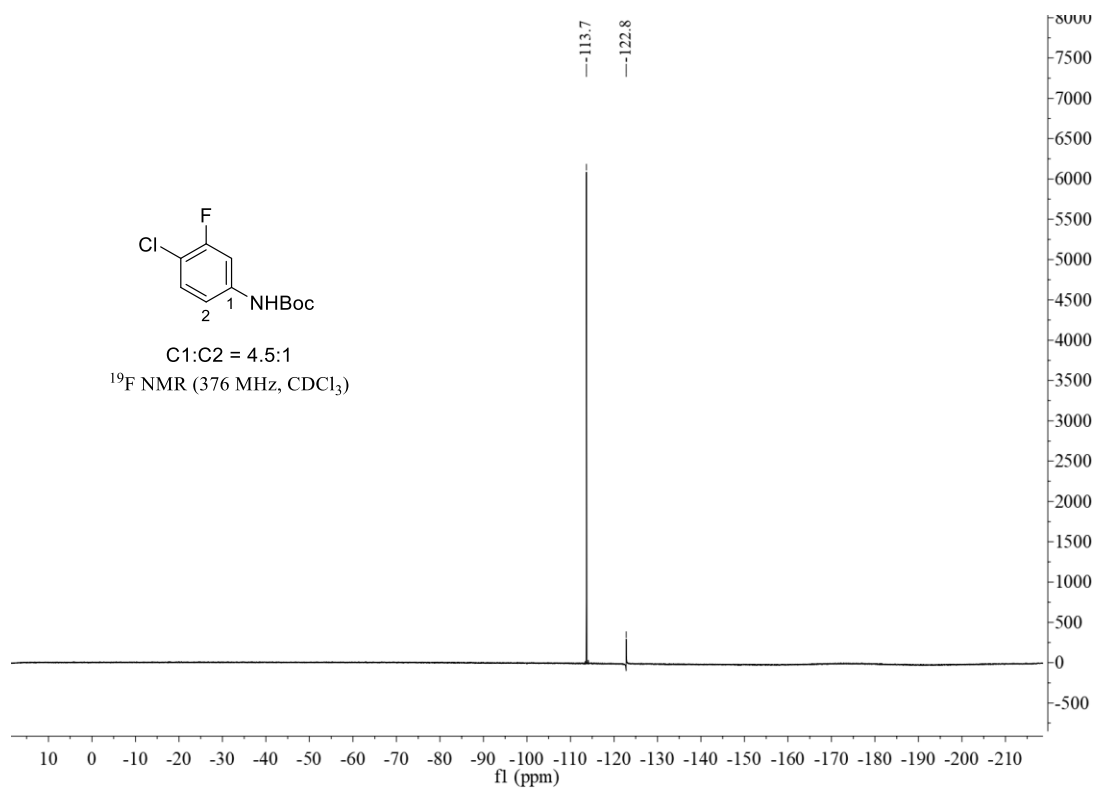

# Compound 9

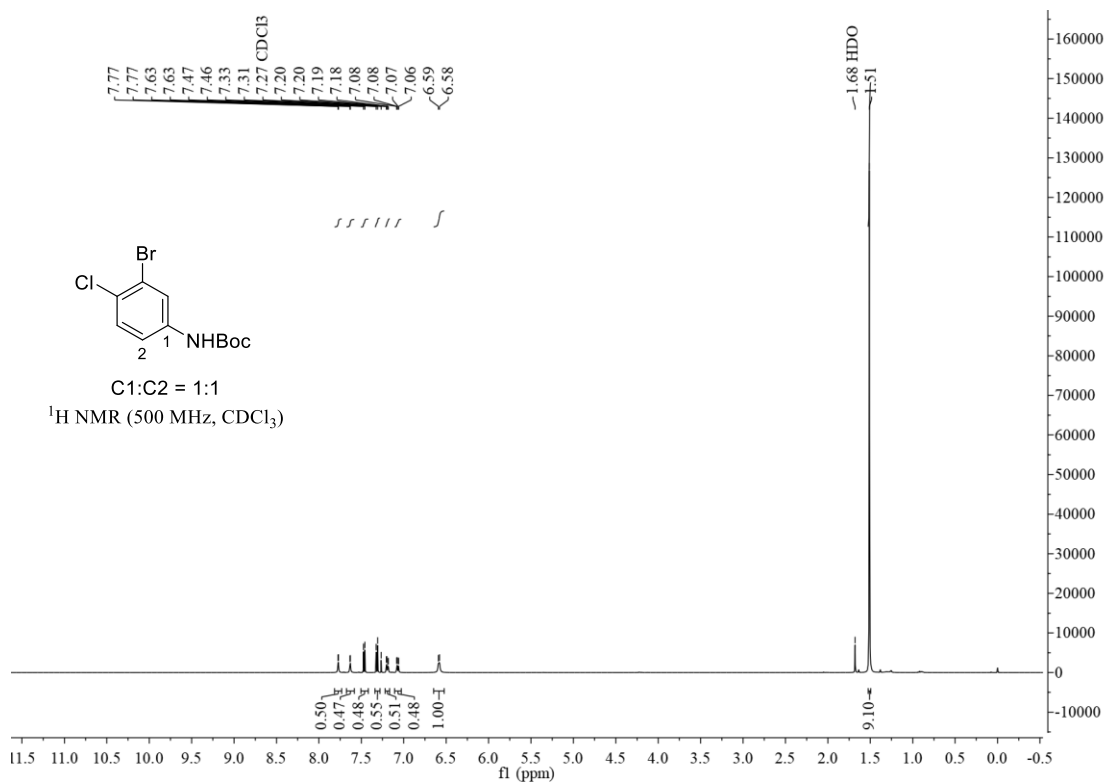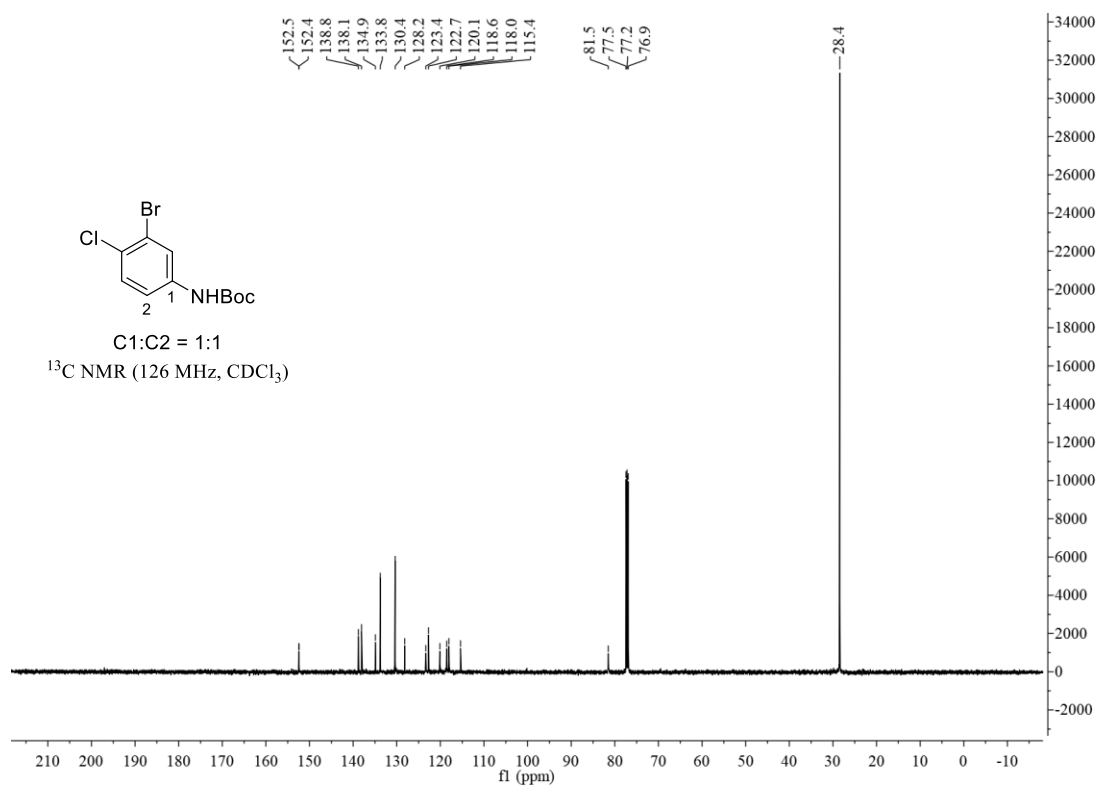

# Compound 10

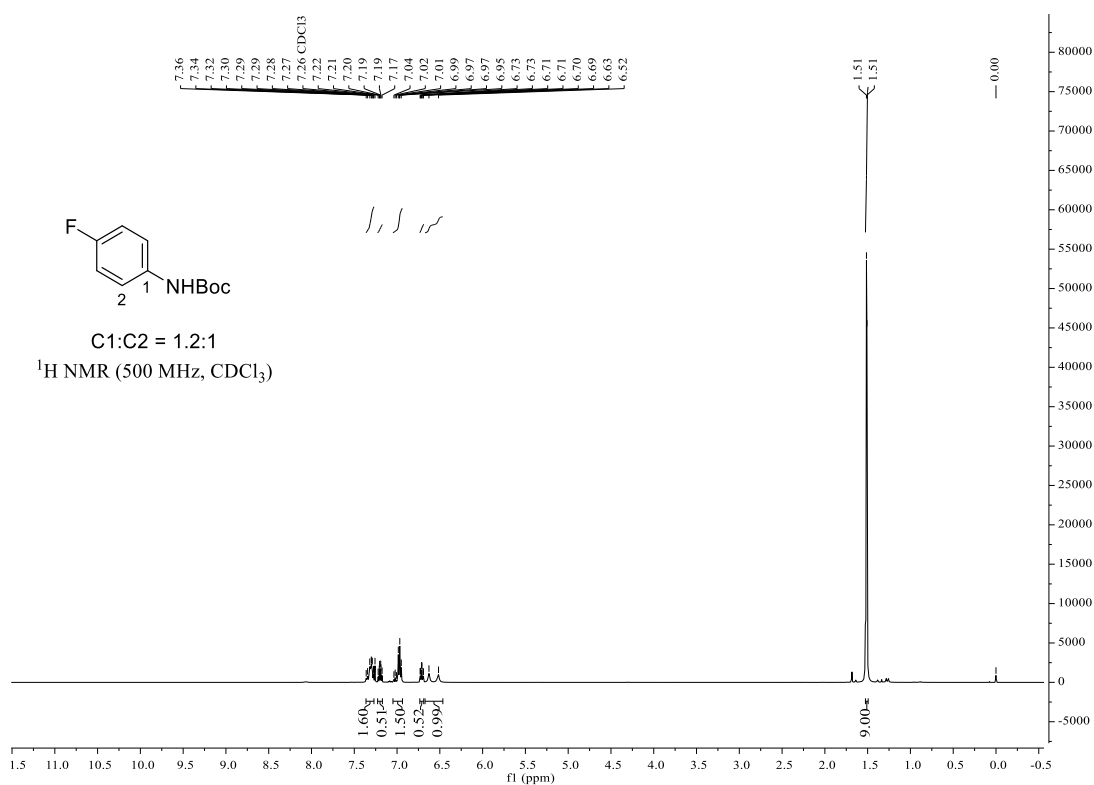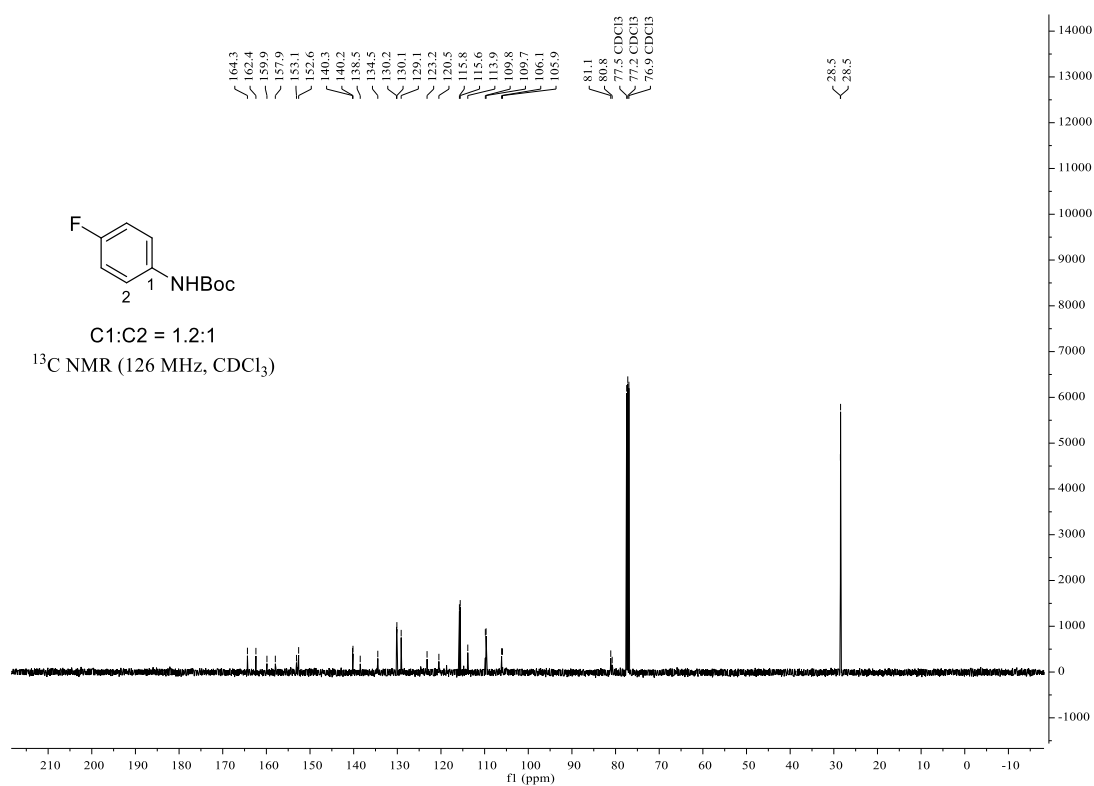

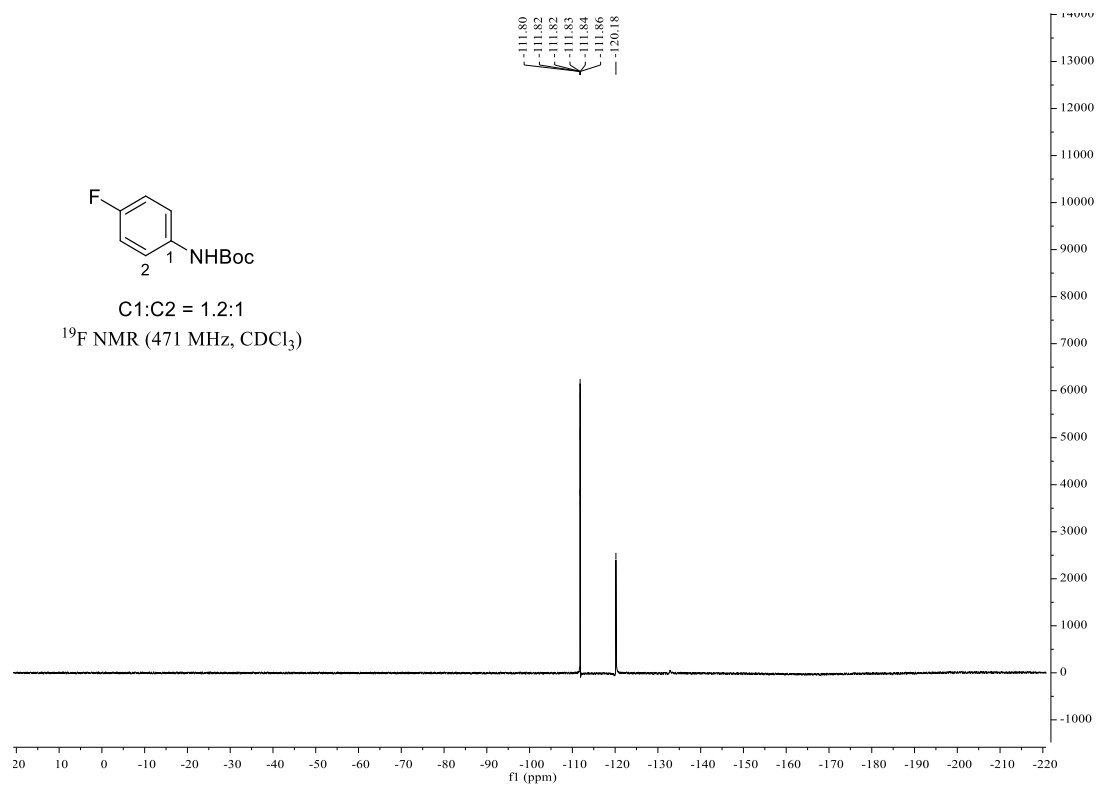

# Compound 11

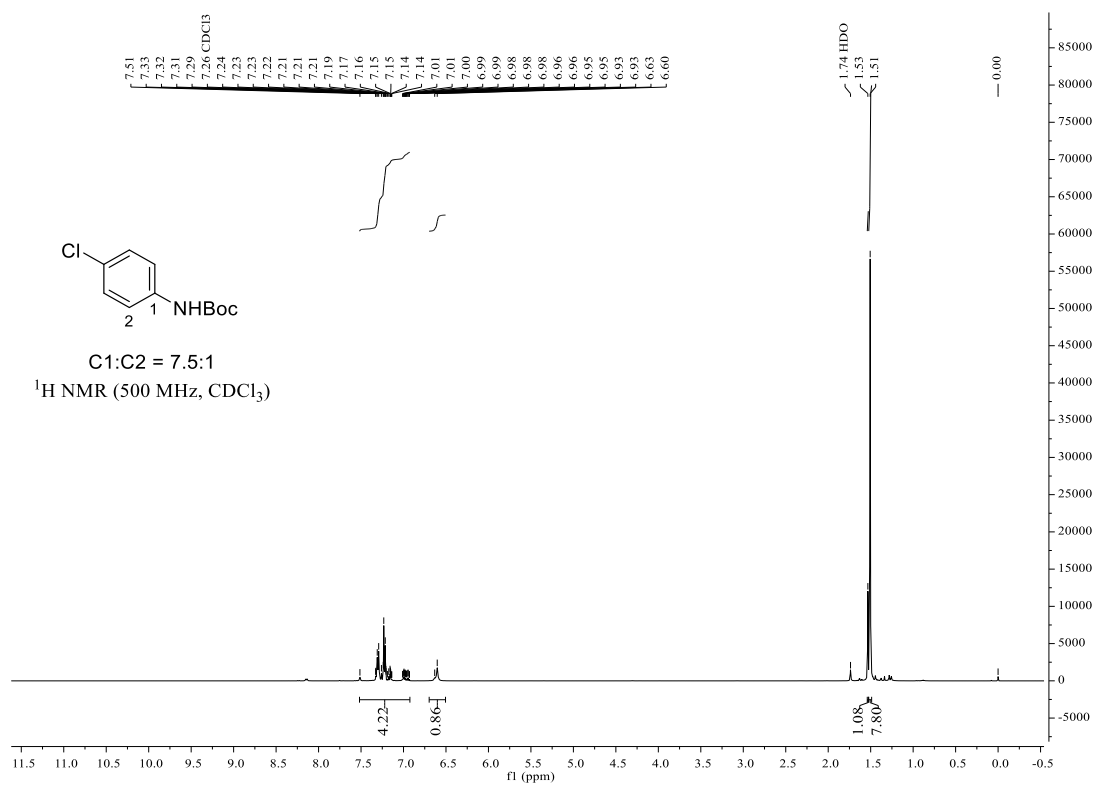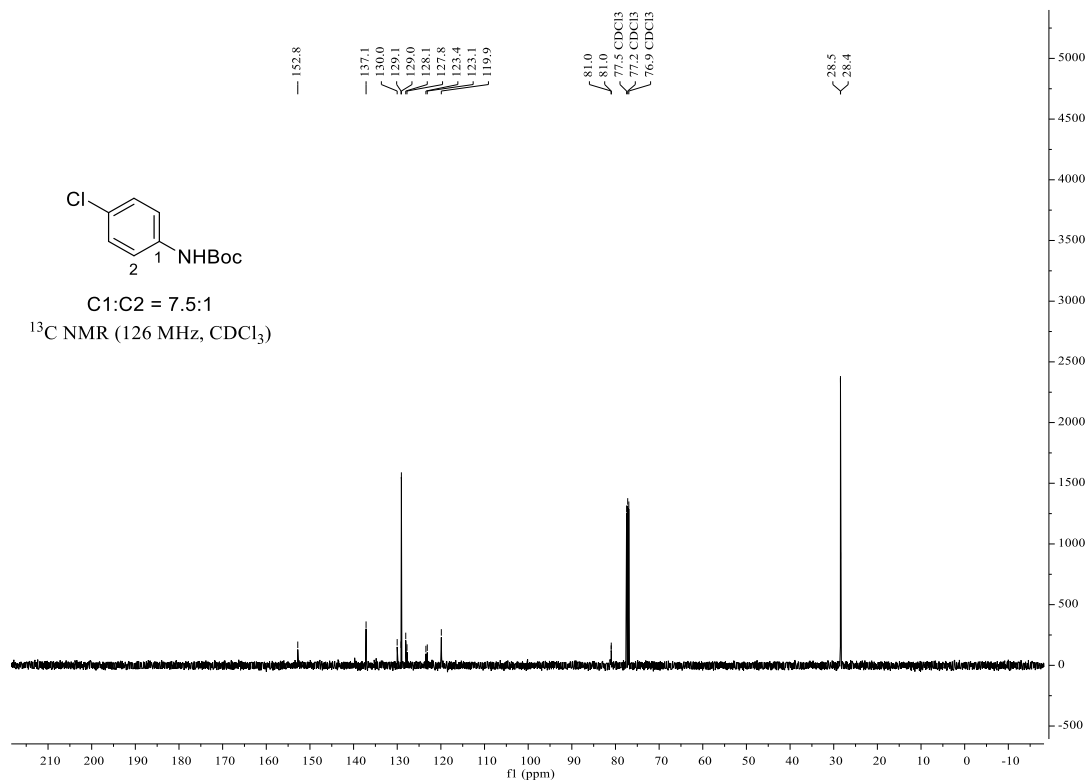

## Compound 12

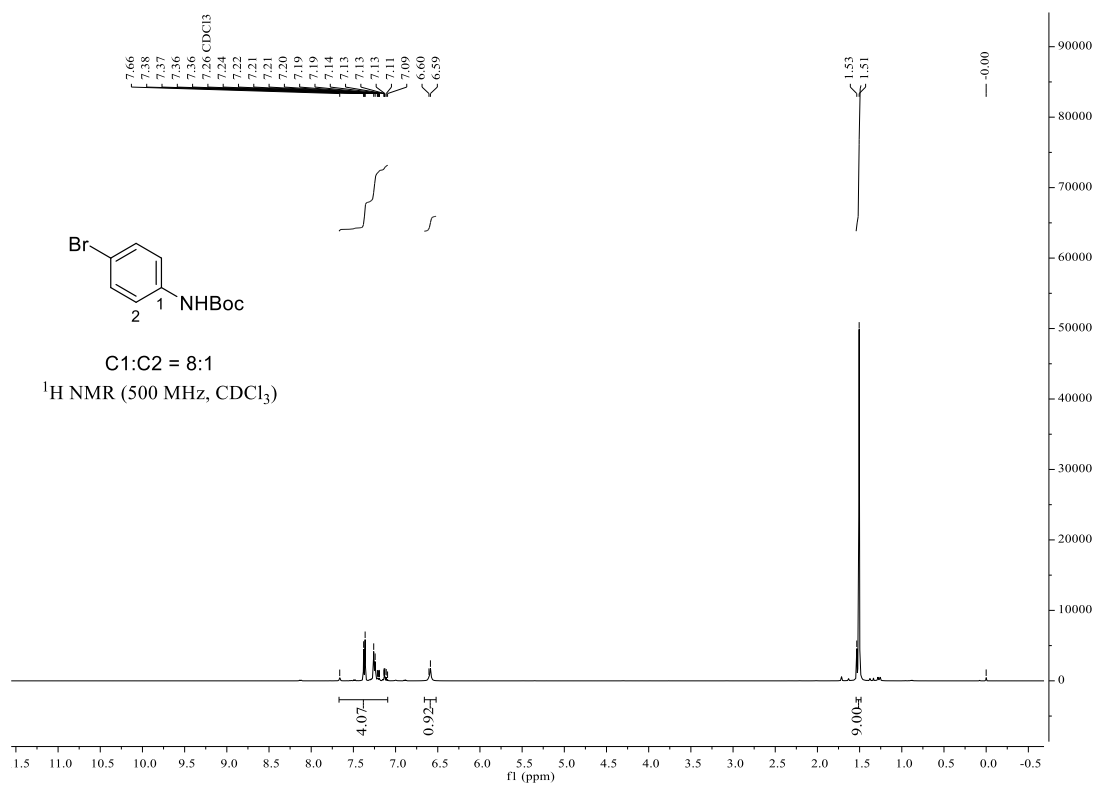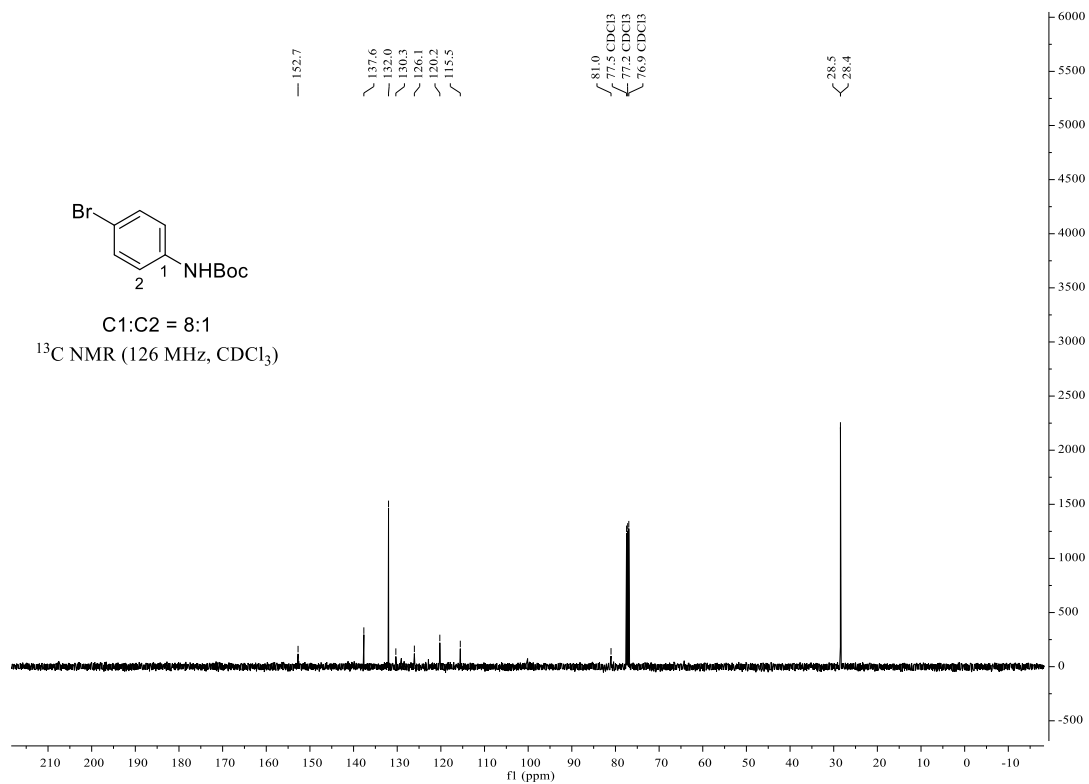

## Compound 15

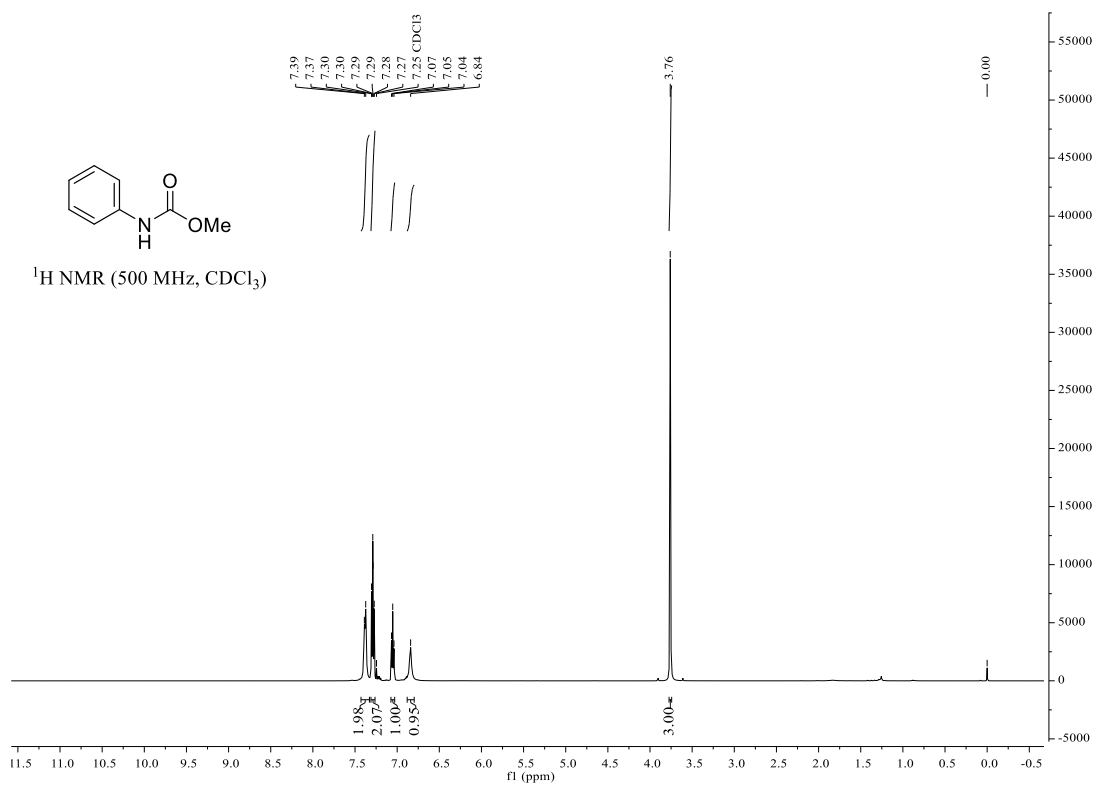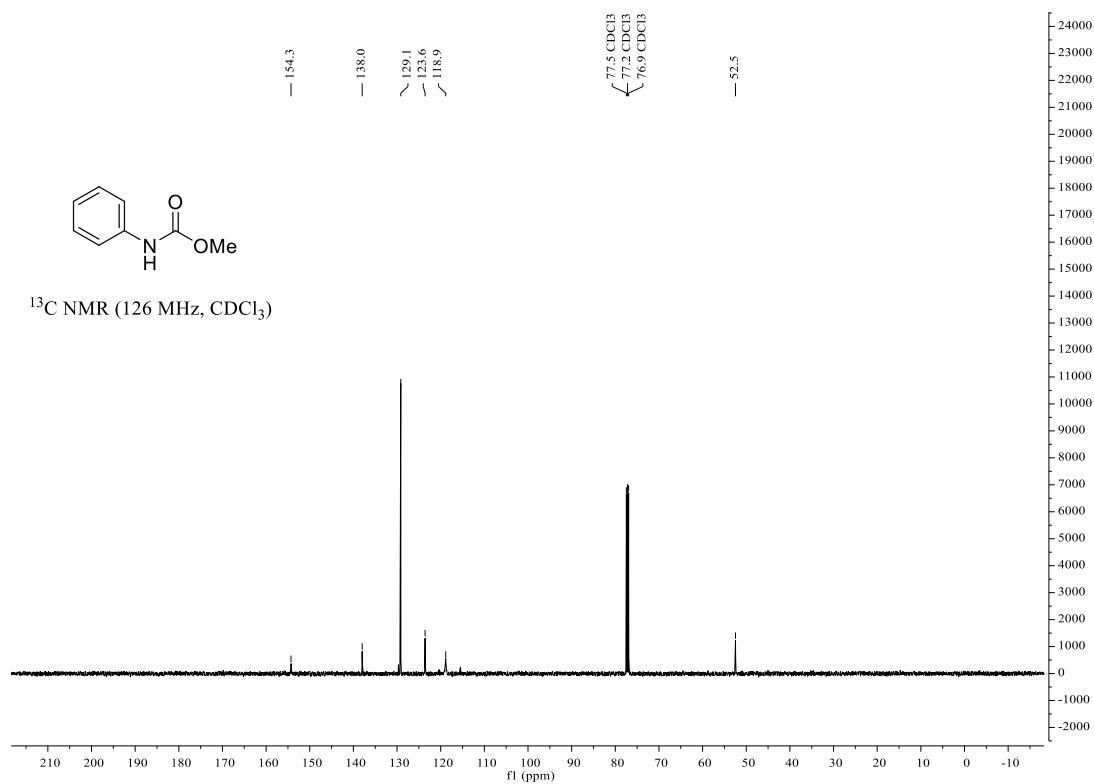

# Compound 16

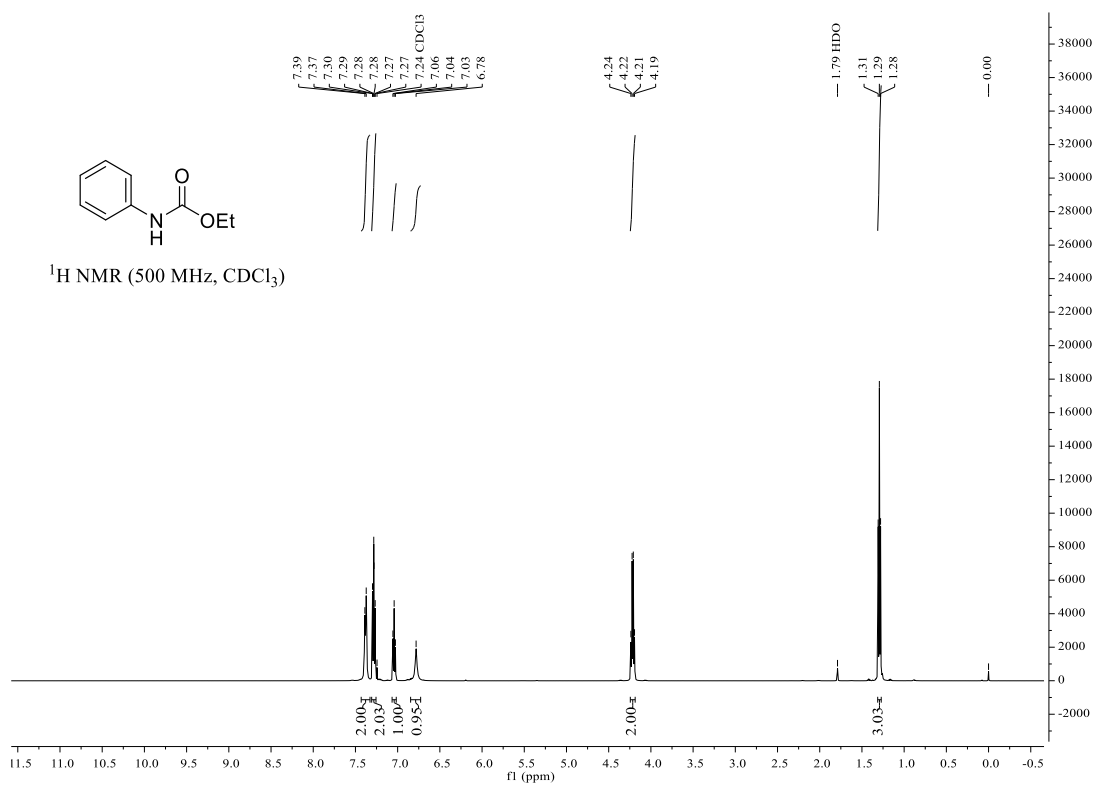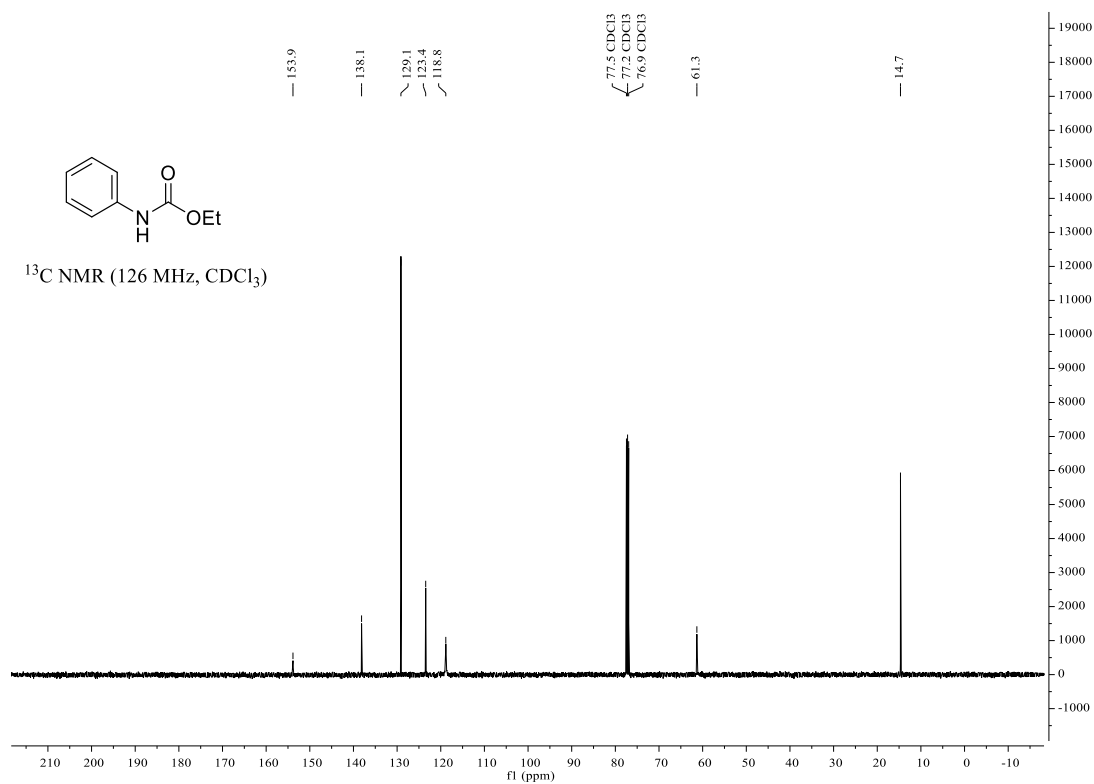

# Compound 17

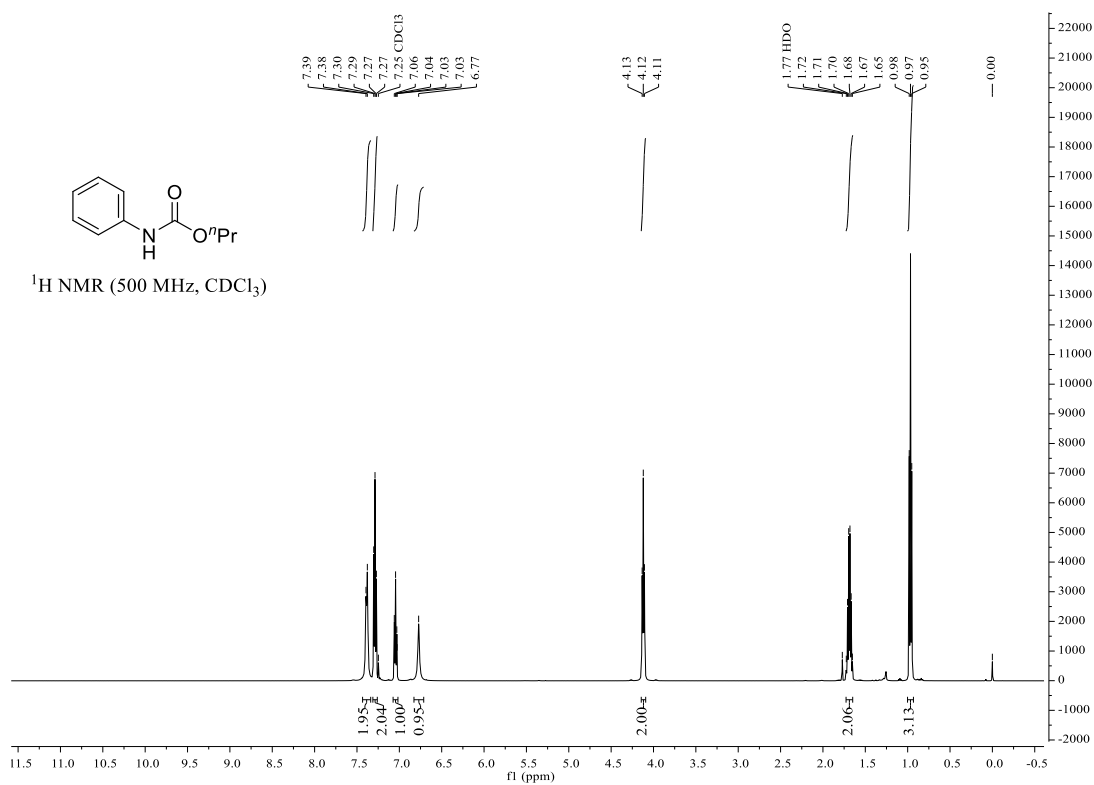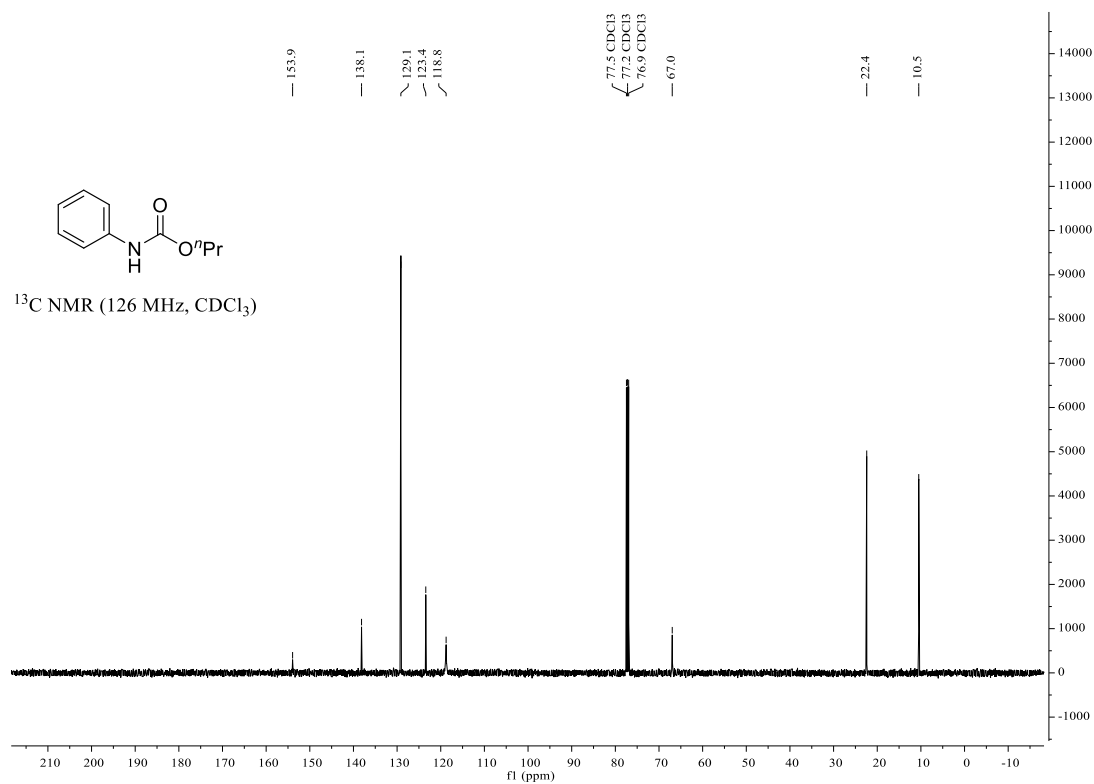

# Compound 18

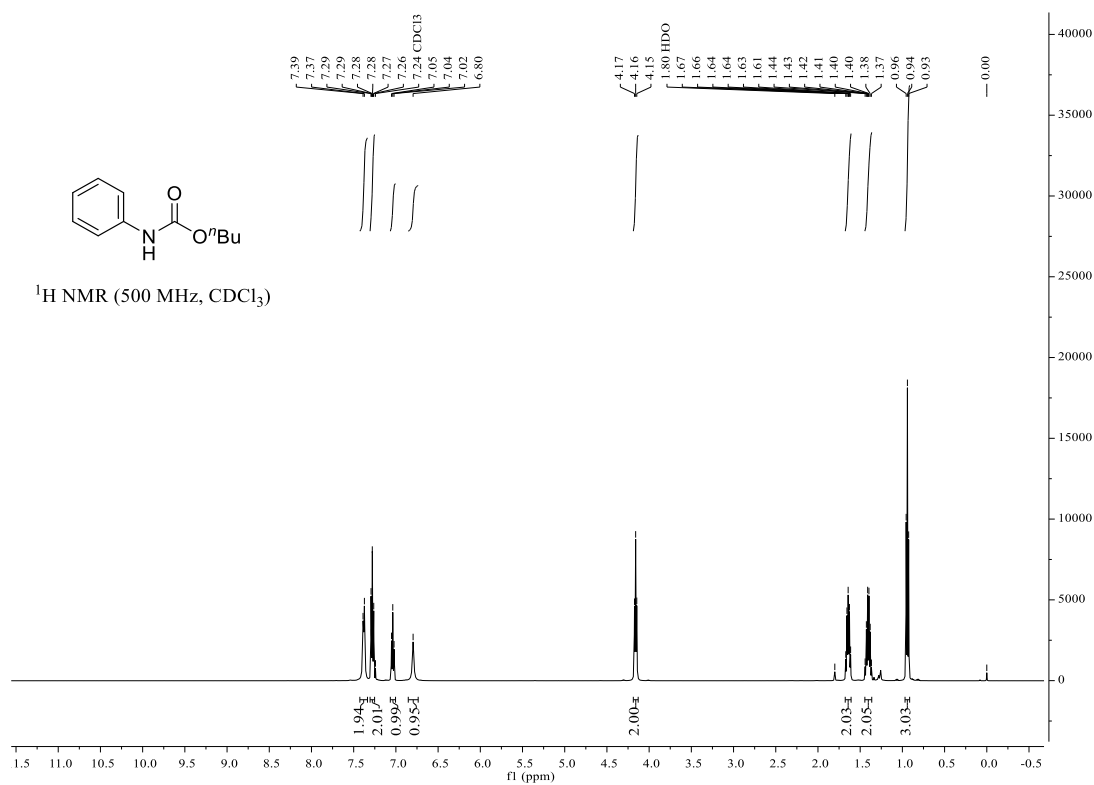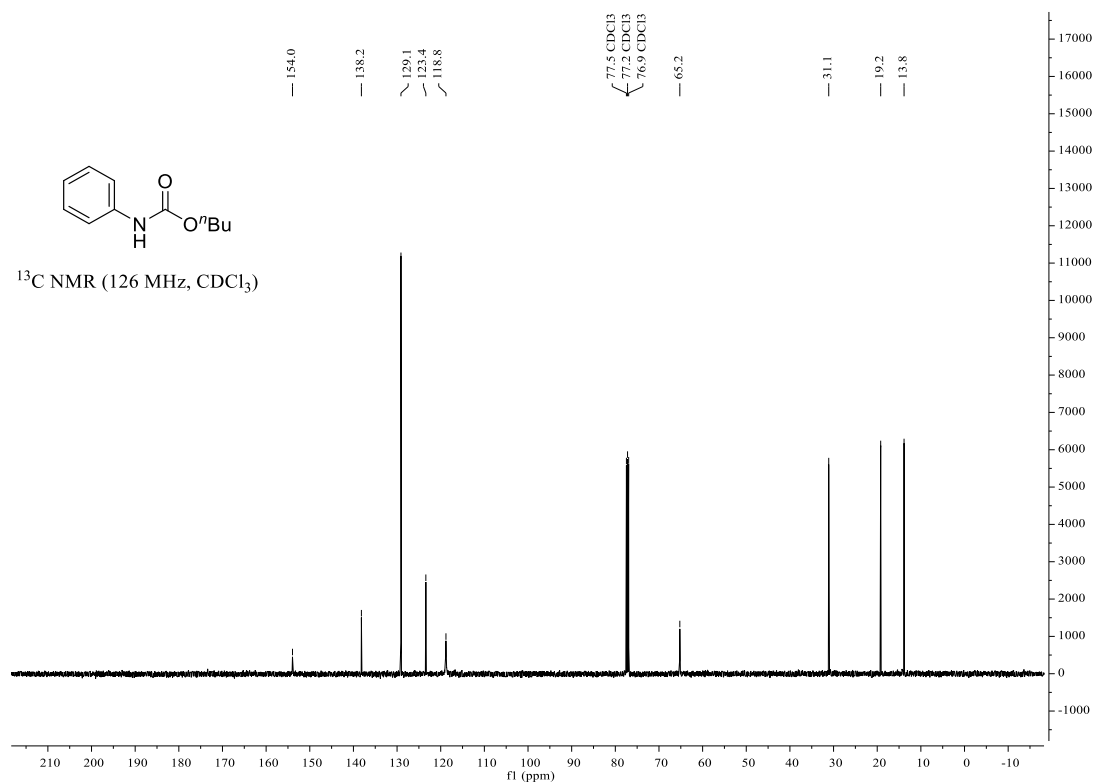

# Compound 19

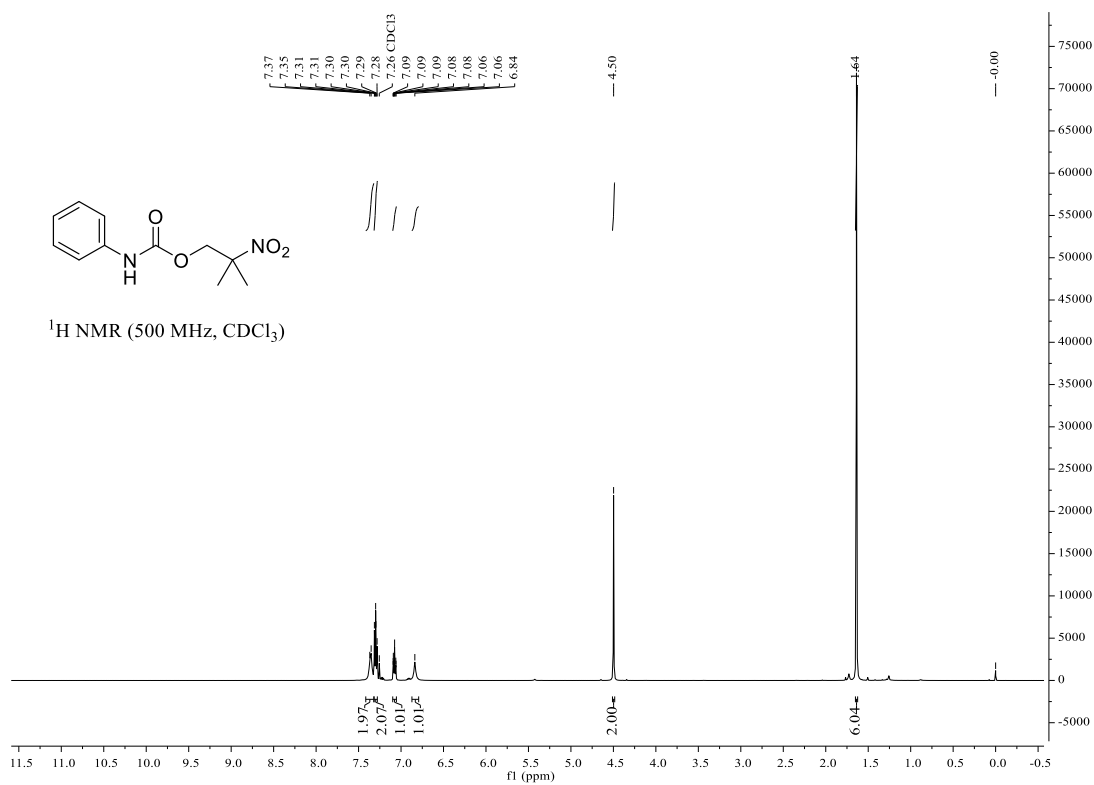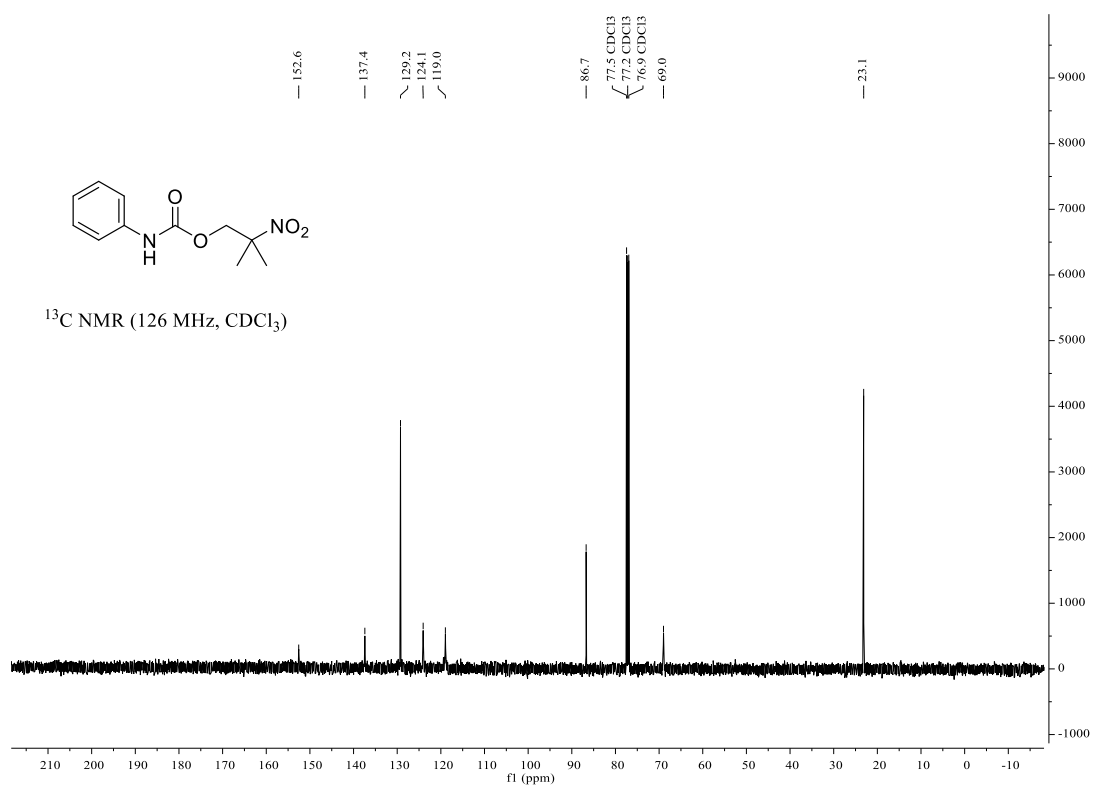

c1ccccc1NC(=O)OC2CCCCC2

<sup>1</sup>H NMR (500 MHz, CDCl<sub>3</sub>)

1.97, 2.08, 1.02, 0.97, 1.00, 2.04, 2.03, 1.03, 4.07, 1.05, 0.00

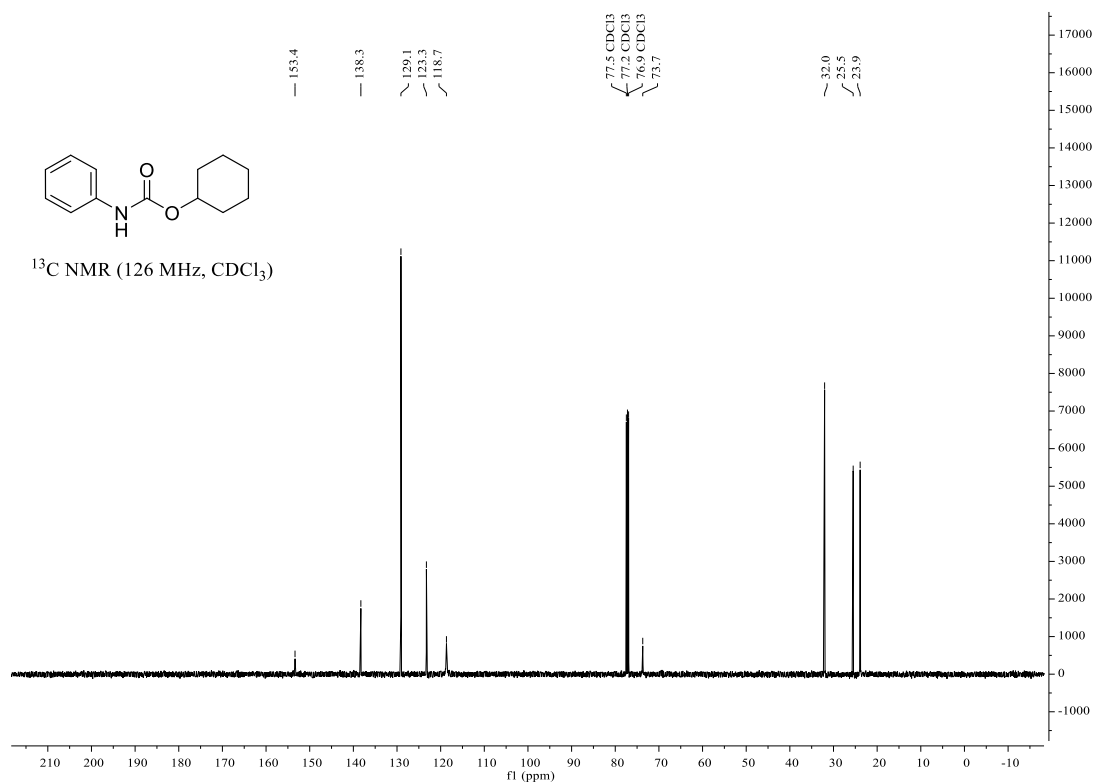

# Compound 21

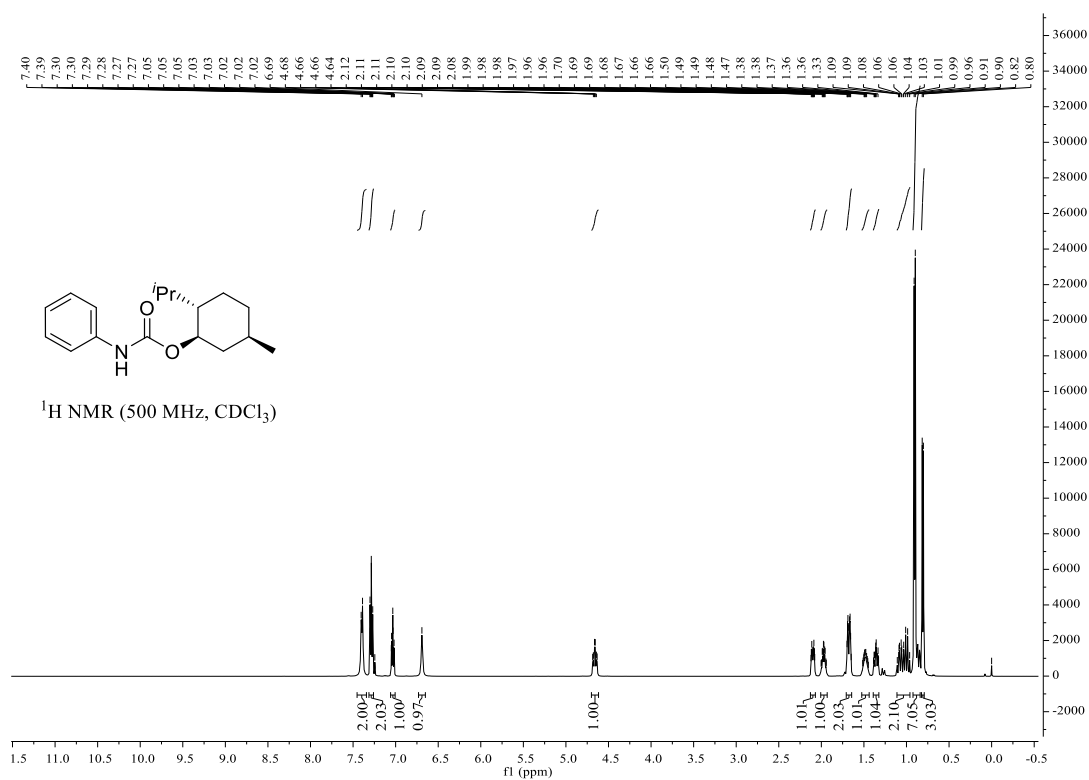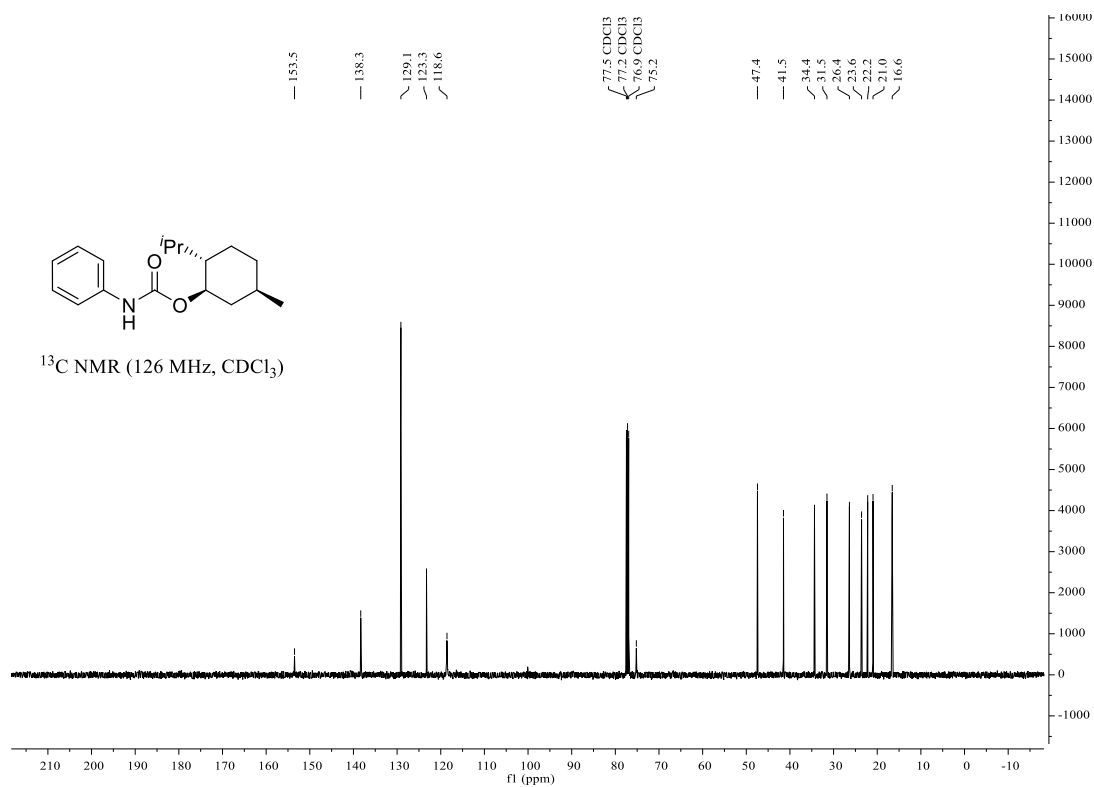

# Compound 22

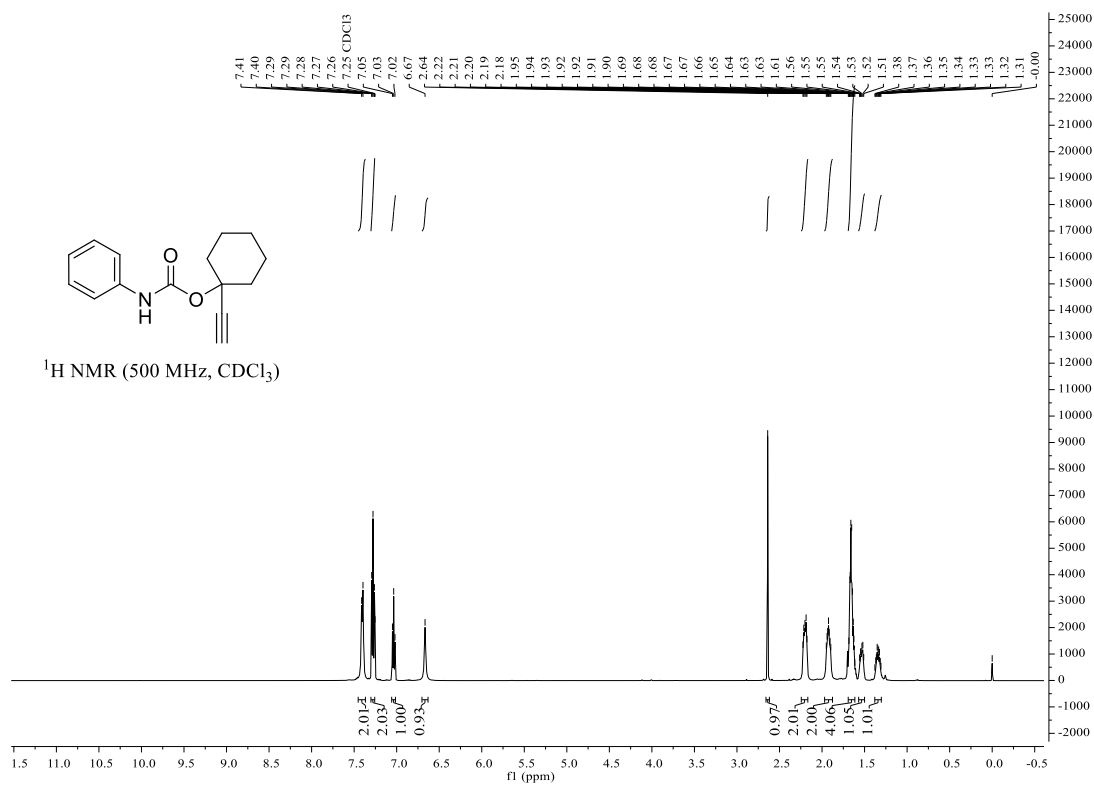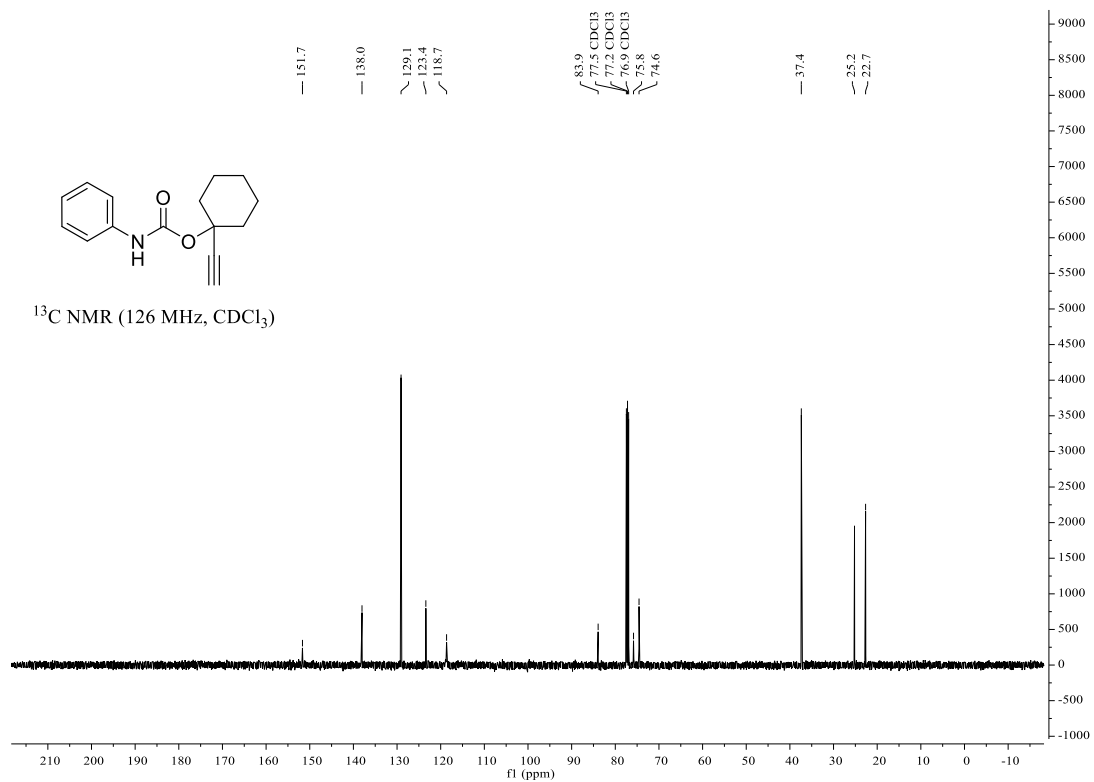

# Compound 23

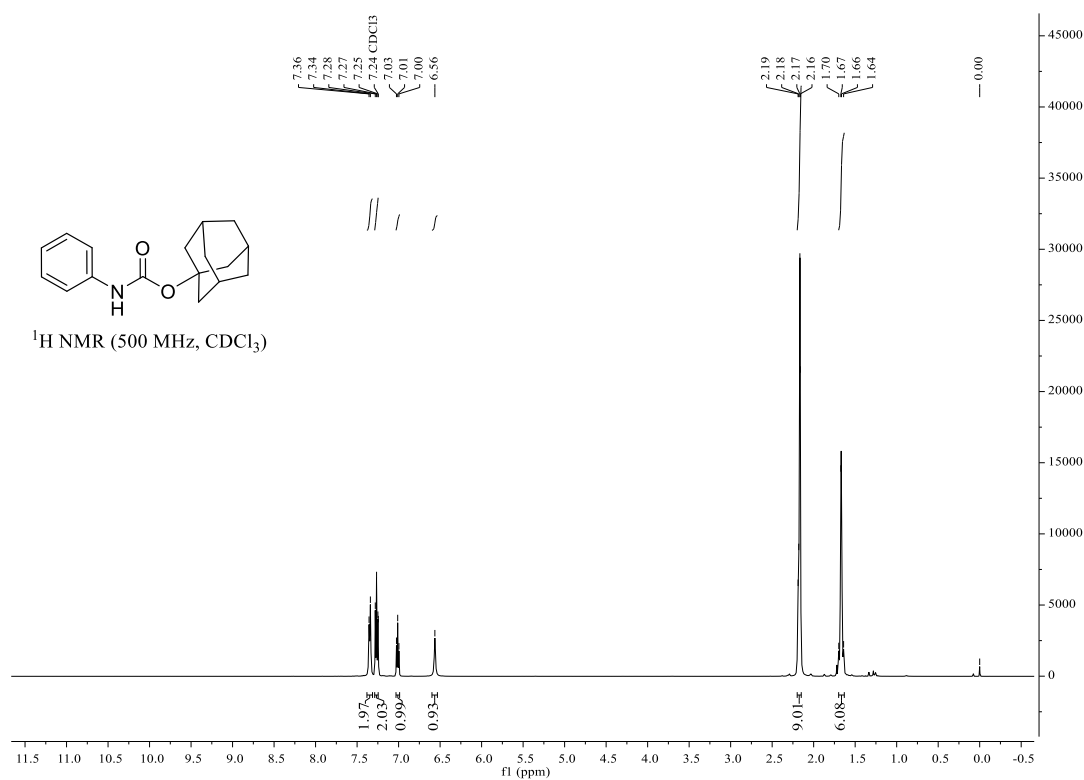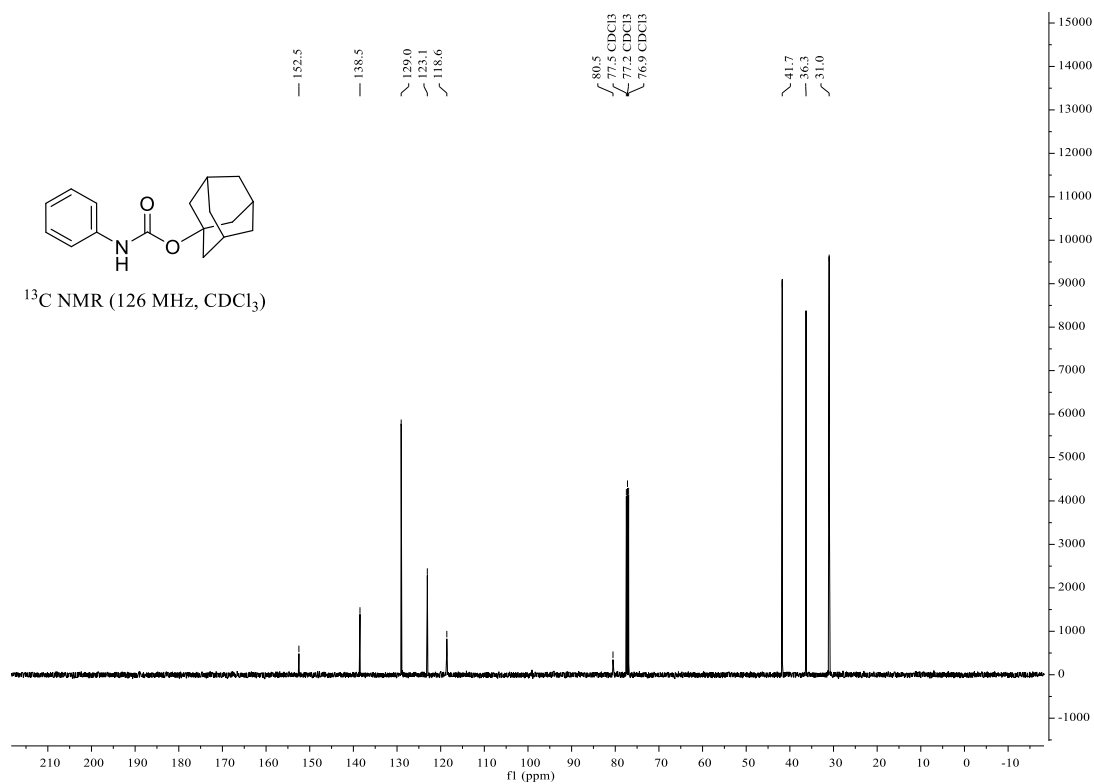

# Compound 24

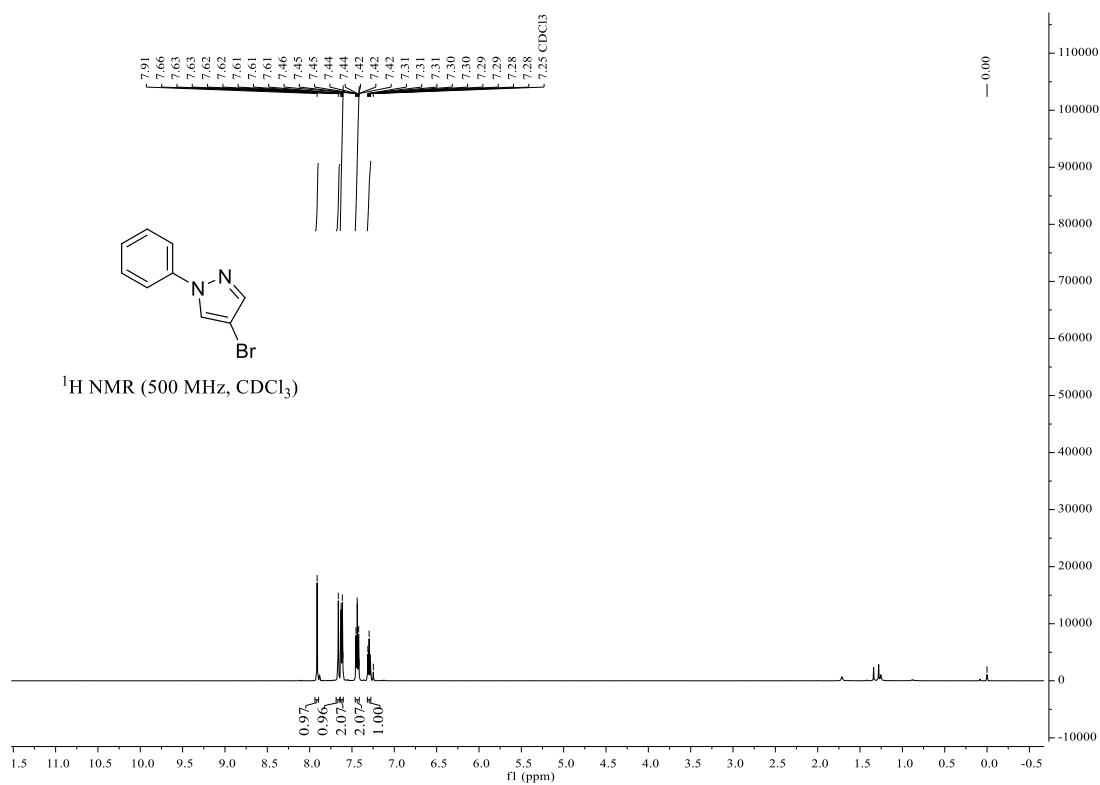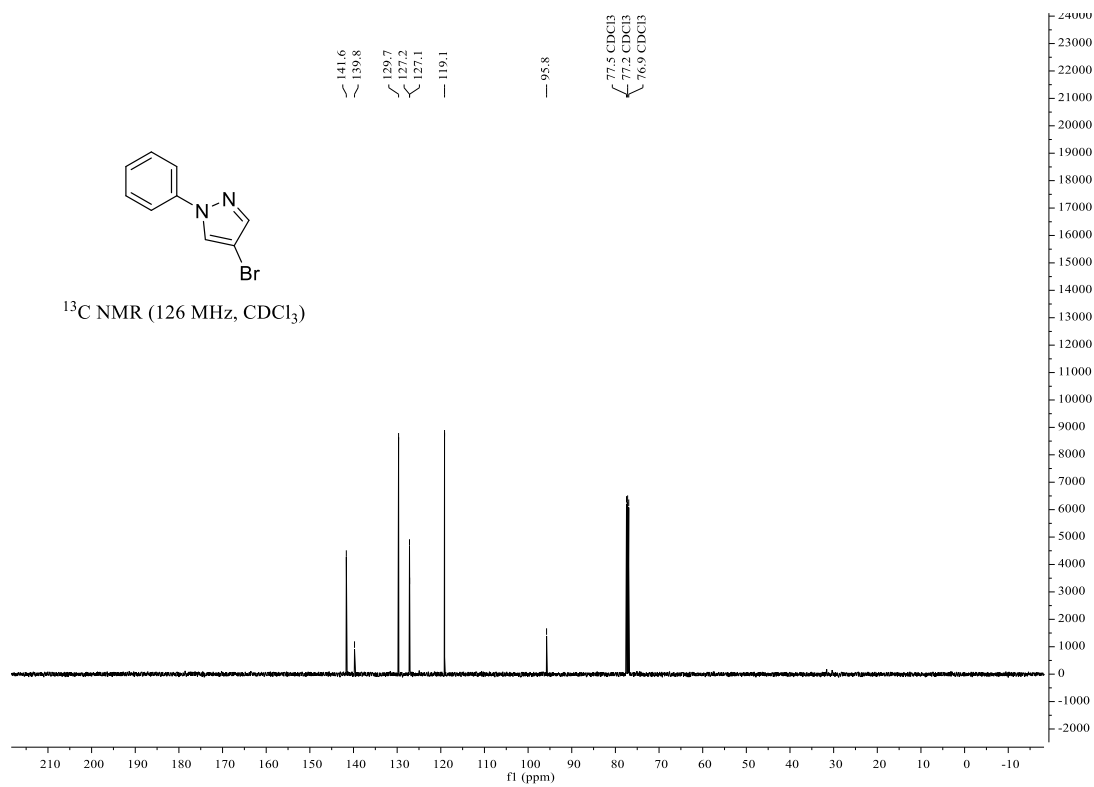

# Compound 25

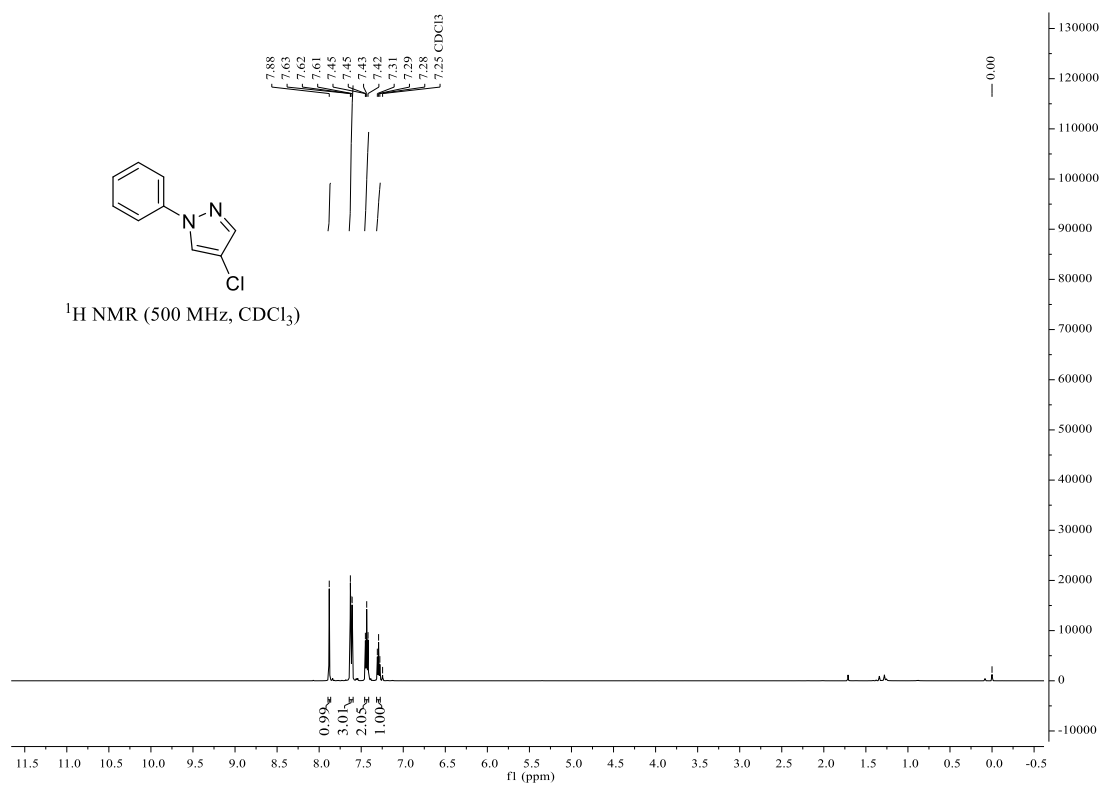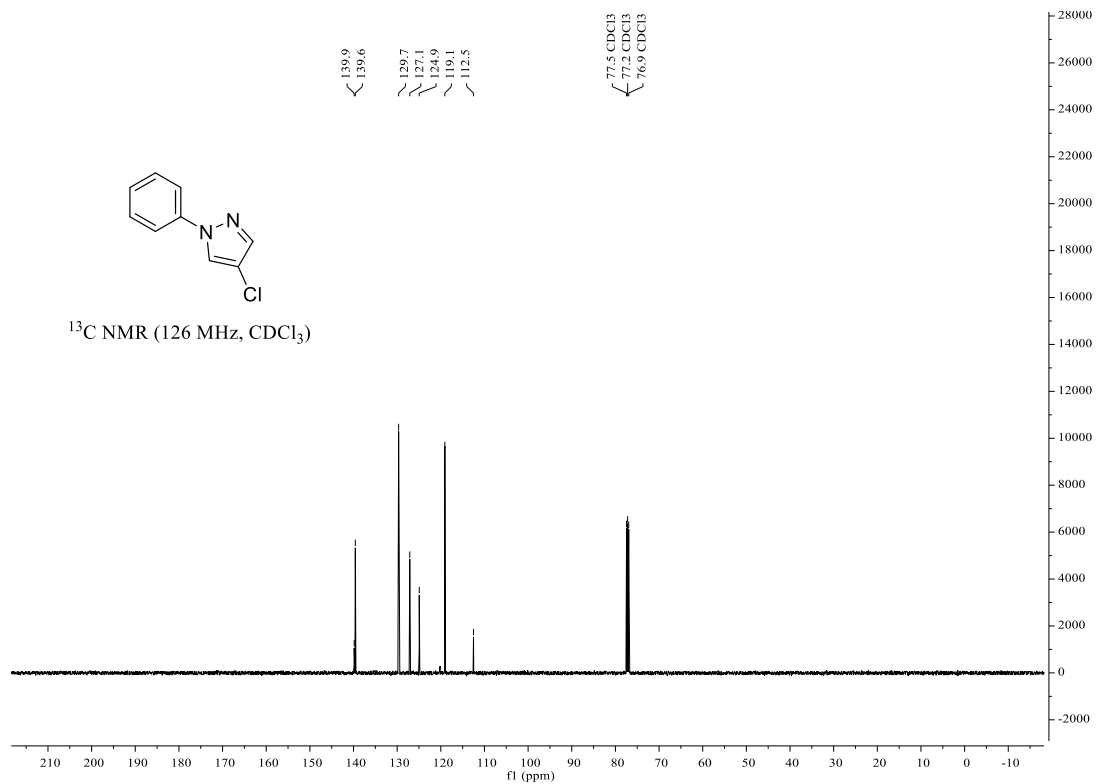

# Compound 26

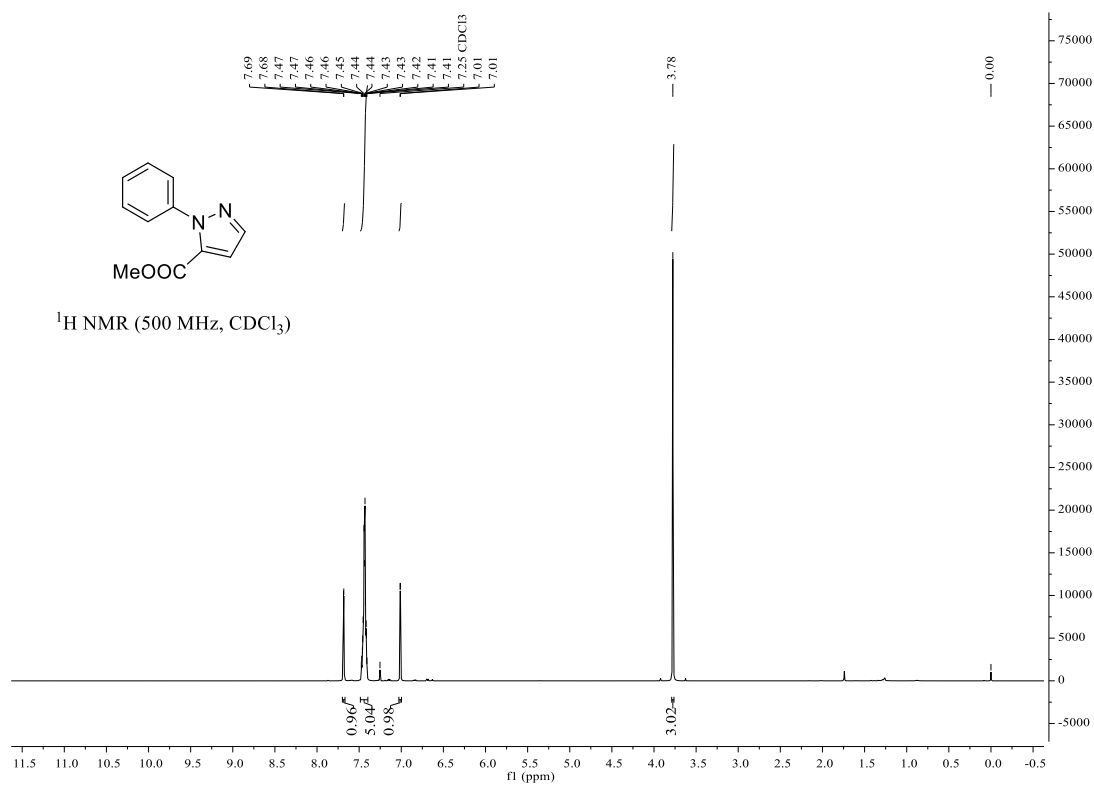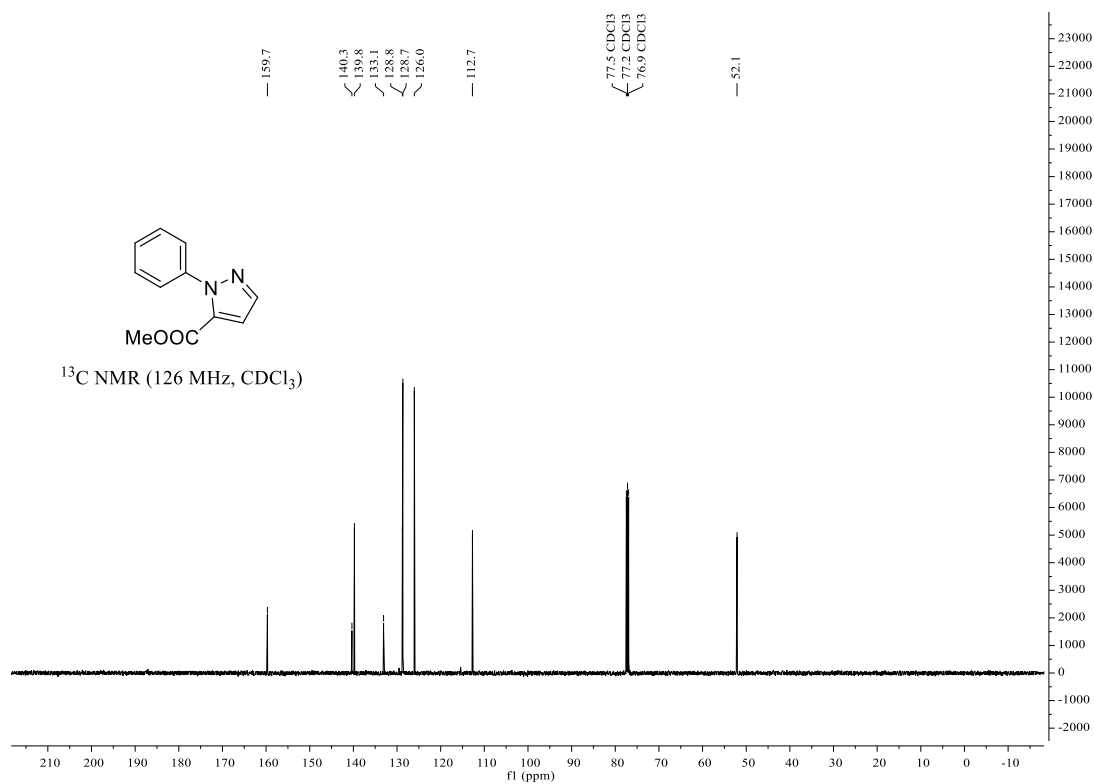

# Compound 27

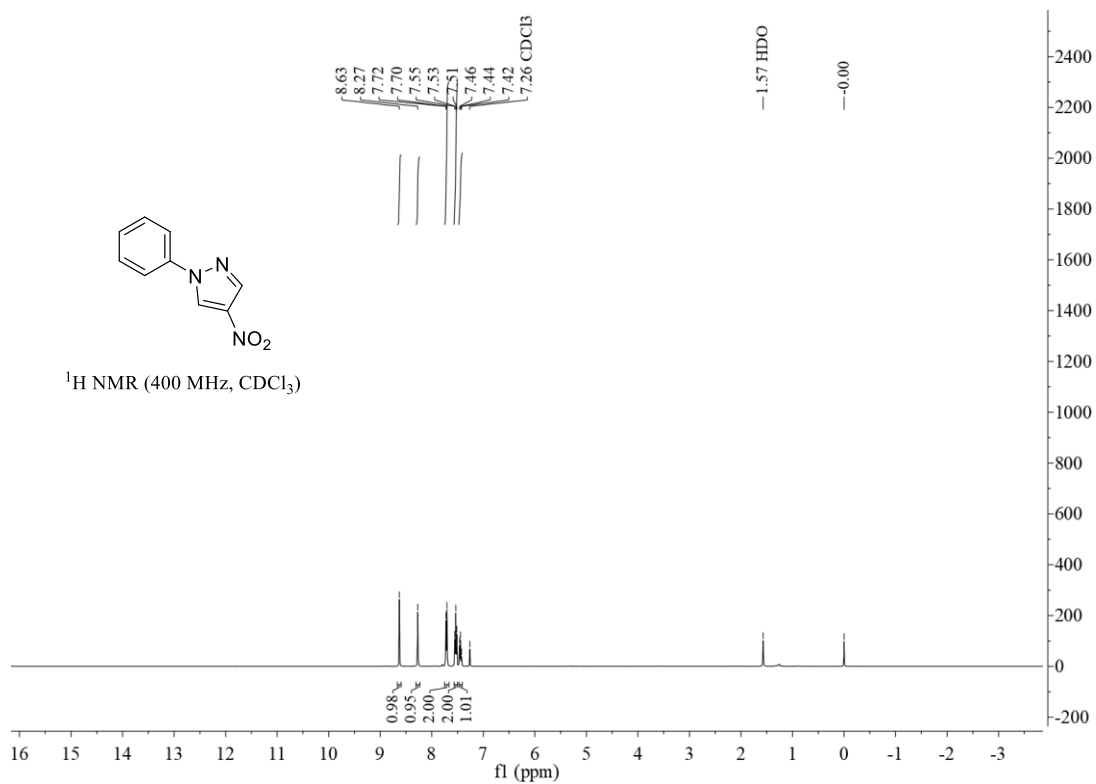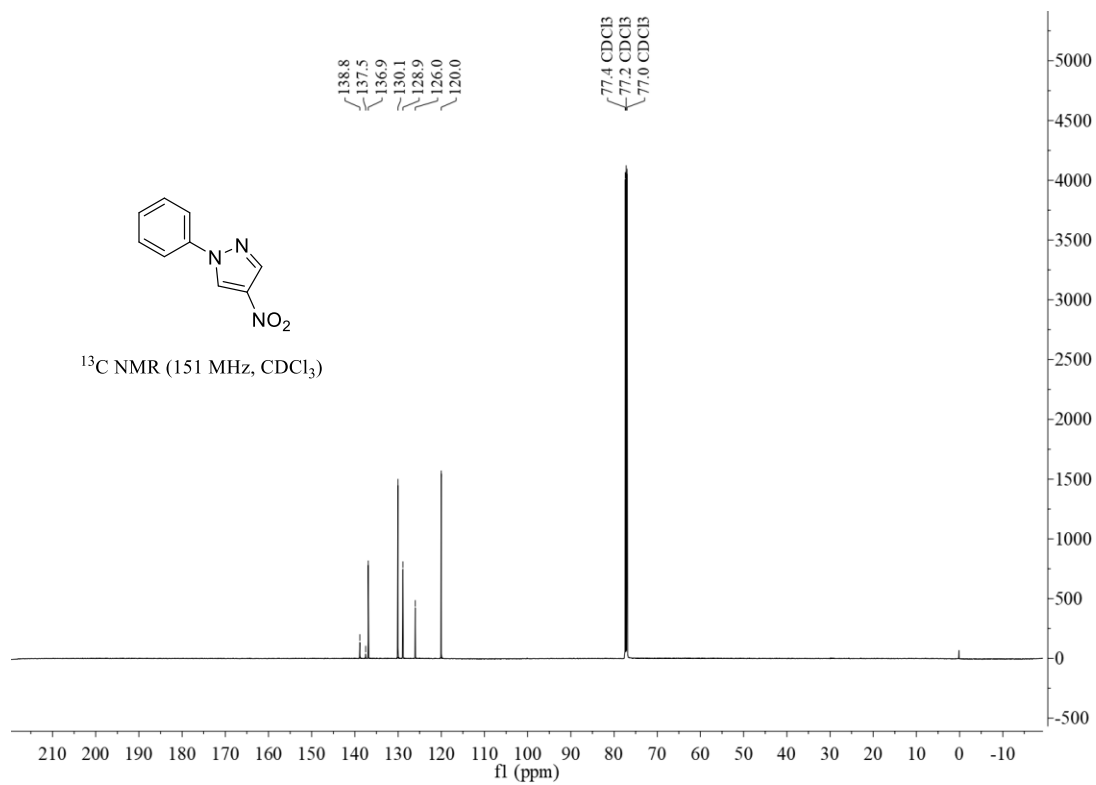

# Compound 28

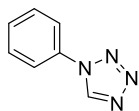

$^1\text{H}$  NMR (400 MHz,  $\text{CDCl}_3$ )

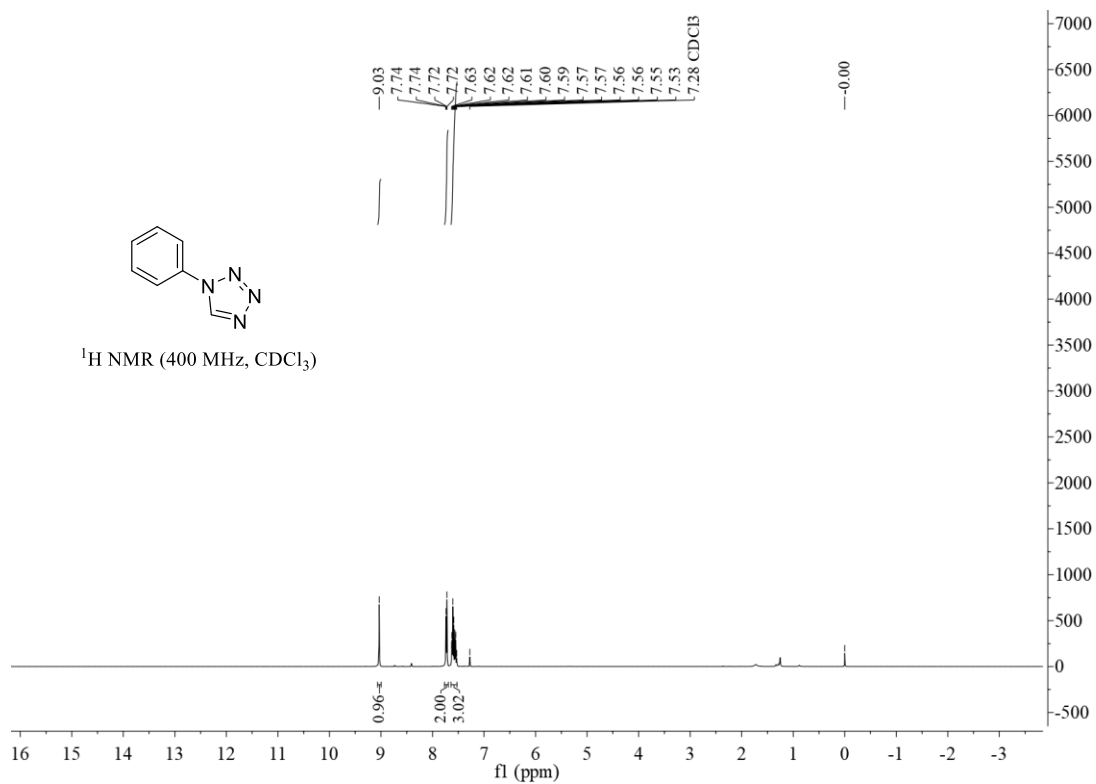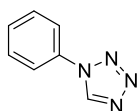

$^{13}\text{C}$  NMR (101 MHz,  $\text{CDCl}_3$ )

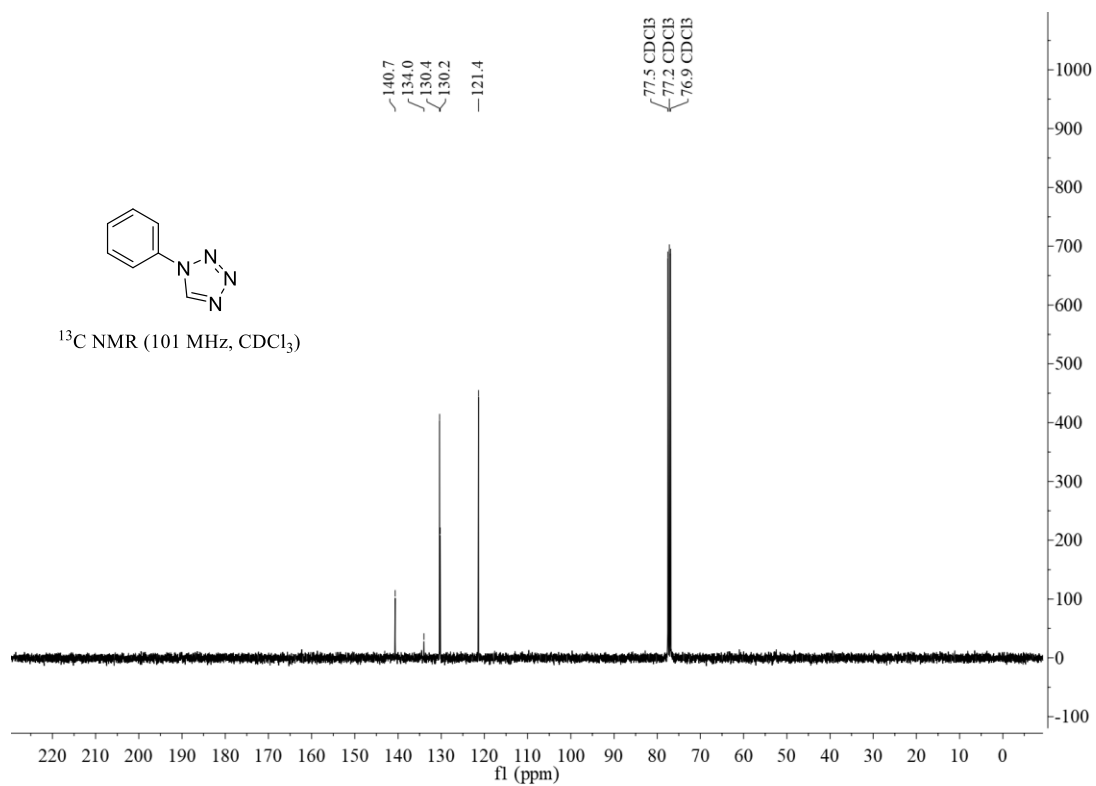

Supplement: d3gc02126b1.pdf [file d3gc02126b1.pdf]
